# Supplementary material for: Dissection of Protein Interactomics Highlights MicroRNA Synergy
Source: PLoS One. 2013 May 14;8(5):e63342. doi: 10.1371/journal.pone.0063342 (PMC3653946; doi:10.1371/journal.pone.0063342)
Supplement: Table S14 — Results of synergy score calculation in human liver. (XLSX) [file pone.0063342.s024.xlsx]

## Sheet: Sheet1
Table S14. Results of synergy score calculation in human liver.
miRNA i	miRNA j	TSS	PIS	synergy score
hsa-miR-222	hsa-miR-21	0.157	1.301	2.4988
hsa-miR-222	hsa-miR-146a	0.083	1.281	2.3888
hsa-miR-146a	hsa-miR-21	0.098	1.245	2.339
hsa-miR-21	hsa-miR-155	0.205	1.151	2.2768
hsa-miR-206	hsa-miR-21	0.074	1.217	2.2646
hsa-miR-200b	hsa-miR-21	0.072	1.194	2.2212
hsa-miR-145	hsa-miR-21	0.137	1.125	2.162
hsa-miR-143	hsa-miR-146a	0.088	1.143	2.1454
hsa-miR-221	hsa-miR-21	0.147	1.103	2.1324
hsa-miR-206	hsa-miR-200b	0.057	1.148	2.1234
hsa-miR-222	hsa-miR-206	0.108	1.108	2.1024
hsa-miR-146a	hsa-miR-200b	0.062	1.124	2.0852
hsa-miR-143	hsa-miR-222	0.115	1.092	2.0806
hsa-miR-21	hsa-miR-16	0.107	1.075	2.042
hsa-miR-132	hsa-miR-146a	0.099	1.074	2.0322
hsa-miR-143	hsa-miR-21	0.117	1.052	2.0106
hsa-miR-222	hsa-miR-200b	0.093	1.056	1.9938
hsa-miR-146a	hsa-miR-221	0.071	1.061	1.9808
hsa-miR-132	hsa-miR-222	0.061	1.049	1.9492
hsa-miR-429	hsa-miR-200a	0.643	0.714	1.9282
hsa-miR-21	hsa-miR-1	0.09	1.02	1.926
hsa-miR-146a	hsa-miR-155	0.117	1	1.917
hsa-miR-146a	hsa-miR-206	0.065	1.028	1.9154
hsa-miR-145	hsa-miR-206	0.076	1	1.876
hsa-miR-146a	hsa-miR-145	0.093	0.981	1.8588
hsa-miR-143	hsa-miR-206	0.091	0.98	1.855
hsa-miR-223	hsa-miR-146a	0.083	0.976	1.8398
hsa-miR-132	hsa-miR-21	0.059	0.98	1.823
hsa-miR-132	hsa-miR-143	0.065	0.961	1.7948
hsa-miR-200b	hsa-miR-155	0.046	0.969	1.7902
hsa-miR-200c	hsa-miR-21	0.049	0.967	1.7896
hsa-miR-20a	hsa-miR-200b	0.068	0.94	1.76
hsa-miR-132	hsa-miR-206	0.054	0.946	1.7568
hsa-miR-20a	hsa-miR-222	0.101	0.919	1.7552
hsa-miR-206	hsa-miR-221	0.085	0.915	1.732
hsa-miR-20a	hsa-miR-21	0.157	0.868	1.7194
hsa-miR-126	hsa-miR-222	0.141	0.875	1.716
hsa-miR-126	hsa-miR-206	0.077	0.91	1.715
hsa-miR-15a	hsa-miR-21	0.088	0.903	1.7134
hsa-miR-200a	hsa-miR-200b	0.274	0.795	1.705
hsa-miR-222	hsa-miR-155	0.112	0.882	1.6996
hsa-miR-145	hsa-miR-155	0.103	0.886	1.6978
hsa-miR-222	hsa-miR-145	0.094	0.887	1.6906
hsa-miR-143	hsa-miR-20a	0.118	0.871	1.6858
hsa-miR-221	hsa-miR-200b	0.062	0.894	1.6712
hsa-miR-20a	hsa-miR-146a	0.057	0.895	1.668
hsa-miR-206	hsa-miR-155	0.081	0.876	1.6578
hsa-miR-132	hsa-miR-145	0.041	0.897	1.6556
hsa-miR-145	hsa-miR-200b	0.056	0.888	1.6544
hsa-miR-223	hsa-miR-143	0.105	0.855	1.644
hsa-miR-143	hsa-miR-200b	0.076	0.867	1.6366
hsa-let-7a	hsa-miR-21	0.098	0.853	1.6334
hsa-miR-223	hsa-miR-222	0.099	0.852	1.6326
hsa-miR-143	hsa-miR-221	0.088	0.857	1.6306
hsa-miR-223	hsa-miR-21	0.079	0.862	1.6306
hsa-miR-132	hsa-miR-223	0.057	0.871	1.6248
hsa-miR-132	hsa-miR-221	0.06	0.869	1.6242
hsa-miR-125b	hsa-miR-21	0.097	0.846	1.6198
hsa-miR-16-1	hsa-miR-222	0.069	0.861	1.6188
hsa-miR-146a	hsa-miR-16	0.067	0.855	1.606
hsa-miR-143	hsa-let-7a	0.1	0.833	1.5994
hsa-miR-146a	hsa-miR-125b	0.053	0.858	1.5974
hsa-let-7a	hsa-miR-222	0.072	0.845	1.593
hsa-miR-126	hsa-miR-21	0.08	0.839	1.5902
hsa-miR-143	hsa-miR-155	0.089	0.834	1.5902
hsa-miR-20a	hsa-miR-206	0.053	0.851	1.5848
hsa-miR-20a	hsa-miR-221	0.099	0.822	1.5786
hsa-miR-143	hsa-miR-145	0.207	0.761	1.5768
hsa-miR-141	hsa-miR-21	0.067	0.836	1.5718
hsa-miR-126	hsa-miR-221	0.119	0.806	1.5698
hsa-miR-141	hsa-miR-200b	0.206	0.753	1.5614
hsa-miR-155	hsa-miR-16	0.094	0.812	1.5556
hsa-miR-126	hsa-miR-146a	0.087	0.812	1.5486
hsa-miR-222	hsa-miR-125b	0.104	0.802	1.5476
hsa-miR-145	hsa-miR-221	0.063	0.82	1.539
hsa-miR-206	hsa-miR-200c	0.05	0.826	1.5368
hsa-miR-22	hsa-miR-222	0.078	0.805	1.527
hsa-miR-200c	hsa-miR-200b	0.553	0.541	1.5268
hsa-miR-20b	hsa-miR-222	0.054	0.811	1.5138
hsa-miR-200b	hsa-miR-16	0.063	0.802	1.5066
hsa-miR-9	hsa-miR-200b	0.057	0.805	1.506
hsa-miR-17-5p	hsa-miR-222	0.096	0.781	1.5018
hsa-miR-146a	hsa-miR-141	0.051	0.806	1.5018
hsa-miR-223	hsa-miR-145	0.108	0.774	1.5012
hsa-miR-146a	hsa-miR-200c	0.073	0.791	1.4968
hsa-miR-132	hsa-miR-155	0.074	0.79	1.496
hsa-miR-143	hsa-miR-141	0.079	0.787	1.4956
hsa-miR-155	hsa-miR-1	0.086	0.782	1.4936
hsa-miR-20b	hsa-miR-20a	0.349	0.635	1.492
hsa-miR-221	hsa-miR-155	0.073	0.781	1.4788
hsa-let-7a	hsa-miR-145	0.083	0.771	1.4708
hsa-miR-192	hsa-miR-146a	0.087	0.768	1.4694
hsa-miR-223	hsa-miR-206	0.075	0.774	1.4682
hsa-miR-15a	hsa-miR-16	0.44	0.571	1.4678
hsa-miR-148a	hsa-miR-222	0.027	0.8	1.467
hsa-miR-143	hsa-miR-16	0.059	0.782	1.4666
hsa-let-7a	hsa-miR-146a	0.093	0.763	1.4664
hsa-miR-22	hsa-miR-21	0.082	0.767	1.4626
hsa-miR-145	hsa-miR-1	0.046	0.787	1.4626
hsa-miR-206	hsa-miR-16	0.044	0.786	1.4588
hsa-miR-132	hsa-miR-20a	0.033	0.791	1.4568
hsa-miR-181b	hsa-miR-222	0.089	0.759	1.4552
hsa-miR-222	hsa-miR-200c	0.094	0.755	1.453
hsa-miR-26a	hsa-miR-21	0.077	0.761	1.4468
hsa-miR-200b	hsa-miR-1	0.04	0.78	1.444
hsa-miR-16-1	hsa-miR-21	0.078	0.752	1.4316
hsa-miR-126	hsa-miR-132	0.055	0.764	1.4302
hsa-miR-141	hsa-miR-206	0.047	0.766	1.4258
hsa-miR-203	hsa-miR-21	0.088	0.741	1.4218
hsa-miR-222	hsa-miR-141	0.086	0.742	1.4216
hsa-miR-200a	hsa-miR-146a	0.053	0.76	1.421
hsa-miR-203	hsa-miR-222	0.076	0.747	1.4206
hsa-miR-181b	hsa-miR-200b	0.041	0.765	1.418
hsa-miR-192	hsa-miR-200b	0.072	0.747	1.4166
hsa-miR-222	hsa-miR-9	0.075	0.745	1.416
hsa-let-7a	hsa-miR-200b	0.062	0.752	1.4156
hsa-miR-192	hsa-miR-21	0.096	0.733	1.4154
hsa-miR-126	hsa-miR-17-5p	0.214	0.667	1.4146
hsa-miR-192	hsa-miR-222	0.106	0.727	1.4146
hsa-miR-181b	hsa-miR-21	0.088	0.736	1.4128
hsa-miR-20b	hsa-miR-143	0.043	0.757	1.4056
hsa-miR-181b	hsa-miR-206	0.054	0.75	1.404
hsa-miR-142-5p	hsa-miR-222	0.014	0.77	1.4
hsa-miR-146a	hsa-miR-34a	0.046	0.752	1.3996
hsa-miR-222	hsa-miR-1	0.091	0.727	1.3996
hsa-miR-206	hsa-miR-125b	0.058	0.744	1.3972
hsa-miR-24	hsa-miR-146a	0.051	0.744	1.3902
hsa-miR-16-1	hsa-miR-221	0.082	0.726	1.3888
hsa-miR-223	hsa-miR-200b	0.061	0.737	1.3876
hsa-miR-146a	hsa-miR-1	0.037	0.749	1.3852
hsa-miR-205	hsa-miR-21	0.137	0.693	1.3844
hsa-miR-206	hsa-miR-1	0.18	0.669	1.3842
hsa-miR-223	hsa-miR-221	0.071	0.729	1.3832
hsa-miR-29b	hsa-miR-21	0.071	0.729	1.3832
hsa-miR-200a	hsa-miR-132	0.033	0.75	1.383
hsa-miR-132	hsa-miR-141	0.036	0.747	1.3806
hsa-miR-9	hsa-miR-21	0.068	0.729	1.3802
hsa-miR-146a	hsa-miR-9	0.055	0.736	1.3798
hsa-miR-181a	hsa-miR-222	0.051	0.734	1.3722
hsa-miR-20a	hsa-miR-155	0.095	0.709	1.3712
hsa-miR-222	hsa-miR-16	0.091	0.711	1.3708
hsa-let-7a	hsa-miR-206	0.045	0.736	1.3698
hsa-miR-192	hsa-miR-143	0.079	0.714	1.3642
hsa-miR-24	hsa-miR-222	0.067	0.72	1.363
hsa-miR-19b	hsa-miR-222	0.06	0.723	1.3614
hsa-miR-125b	hsa-miR-200b	0.064	0.72	1.36
hsa-miR-150	hsa-miR-146a	0.105	0.697	1.3596
hsa-miR-143	hsa-miR-125b	0.077	0.712	1.3586
hsa-miR-145	hsa-miR-16	0.085	0.706	1.3558
hsa-miR-126	hsa-miR-223	0.132	0.679	1.3542
hsa-miR-143	hsa-miR-1	0.063	0.716	1.3518
hsa-miR-222	hsa-miR-15a	0.067	0.713	1.3504
hsa-miR-200c	hsa-miR-155	0.03	0.731	1.3458
hsa-miR-34a	hsa-miR-21	0.087	0.698	1.3434
hsa-miR-200a	hsa-miR-222	0.116	0.681	1.3418
hsa-miR-142-5p	hsa-miR-429	0.048	0.714	1.3332
hsa-miR-20a	hsa-miR-1	0.053	0.709	1.3292
hsa-miR-126	hsa-miR-200b	0.113	0.675	1.328
hsa-miR-203	hsa-miR-206	0.067	0.7	1.327
hsa-miR-16-1	hsa-miR-143	0.108	0.677	1.3266
hsa-miR-20a	hsa-miR-145	0.183	0.635	1.326
hsa-miR-20b	hsa-miR-106b	0.381	0.524	1.3242
hsa-miR-429	hsa-miR-222	0.06	0.701	1.3218
hsa-miR-143	hsa-miR-181b	0.066	0.697	1.3206
hsa-miR-15b	hsa-miR-146a	0.04	0.71	1.318
hsa-miR-142-5p	hsa-miR-200a	0.042	0.708	1.3164
hsa-miR-214	hsa-miR-222	0.043	0.707	1.3156
hsa-miR-203	hsa-miR-143	0.067	0.693	1.3144
hsa-miR-145	hsa-miR-15a	0.088	0.681	1.3138
hsa-miR-132	hsa-miR-200b	0.04	0.707	1.3126
hsa-miR-16-1	hsa-miR-132	0.069	0.69	1.311
hsa-miR-20a	hsa-miR-200c	0.042	0.703	1.3074
hsa-miR-17-5p	hsa-miR-200b	0.067	0.689	1.3072
hsa-miR-203	hsa-miR-145	0.112	0.663	1.3054
hsa-miR-146a	hsa-miR-15a	0.052	0.695	1.303
hsa-miR-142-5p	hsa-miR-200b	0.034	0.705	1.303
hsa-miR-17-5p	hsa-miR-206	0.034	0.705	1.303
hsa-miR-1	hsa-miR-16	0.058	0.691	1.3018
hsa-miR-223	hsa-miR-20a	0.055	0.692	1.3006
hsa-miR-222	hsa-miR-34a	0.098	0.667	1.2986
hsa-miR-205	hsa-miR-222	0.138	0.644	1.2972
hsa-miR-17-5p	hsa-miR-146a	0.051	0.692	1.2966
hsa-miR-122	hsa-miR-21	0.083	0.674	1.2962
hsa-miR-142-5p	hsa-miR-21	0.027	0.705	1.296
hsa-miR-132	hsa-miR-150	0.136	0.644	1.2952
hsa-miR-203	hsa-miR-200b	0.063	0.684	1.2942
hsa-miR-223	hsa-let-7a	0.058	0.686	1.2928
hsa-miR-132	hsa-miR-16	0.05	0.689	1.2902
hsa-miR-142-5p	hsa-miR-146a	0.055	0.685	1.288
hsa-miR-17-5p	hsa-miR-143	0.087	0.667	1.2876
hsa-miR-16-1	hsa-miR-146a	0.068	0.676	1.2848
hsa-miR-22	hsa-miR-206	0.044	0.689	1.2842
hsa-miR-22	hsa-miR-145	0.09	0.663	1.2834
hsa-miR-150	hsa-miR-21	0.075	0.671	1.2828
hsa-miR-206	hsa-miR-15a	0.036	0.691	1.2798
hsa-miR-9	hsa-miR-206	0.059	0.678	1.2794
hsa-miR-126	hsa-miR-200a	0.091	0.659	1.2772
hsa-miR-221	hsa-miR-125b	0.082	0.664	1.2772
hsa-miR-16-1	hsa-miR-22	0.16	0.62	1.276
hsa-miR-126	hsa-miR-20a	0.143	0.629	1.2752
hsa-miR-106b	hsa-miR-20a	0.348	0.515	1.275
hsa-miR-16-1	hsa-miR-20b	0.039	0.686	1.2738
hsa-let-7a	hsa-miR-155	0.067	0.67	1.273
hsa-miR-200a	hsa-miR-21	0.063	0.671	1.2708
hsa-miR-141	hsa-miR-200c	0.162	0.616	1.2708
hsa-miR-24	hsa-miR-21	0.062	0.671	1.2698
hsa-miR-192	hsa-miR-145	0.115	0.641	1.2688
hsa-let-7b	hsa-miR-21	0.048	0.676	1.2648
hsa-miR-107	hsa-miR-200b	0.04	0.68	1.264
hsa-miR-17-5p	hsa-miR-221	0.079	0.658	1.2634
hsa-miR-21	hsa-miR-124	0.034	0.682	1.2616
hsa-miR-24	hsa-miR-206	0.034	0.682	1.2616
hsa-miR-132	hsa-let-7a	0.06	0.667	1.2606
hsa-miR-182	hsa-miR-145	0.105	0.642	1.2606
hsa-miR-20b	hsa-miR-126	0.021	0.688	1.2594
hsa-miR-148a	hsa-miR-21	0.063	0.664	1.2582
hsa-miR-26a	hsa-miR-206	0.03	0.68	1.254
hsa-miR-16-1	hsa-miR-206	0.06	0.663	1.2534
hsa-miR-200a	hsa-miR-206	0.06	0.663	1.2534
hsa-miR-203	hsa-miR-146a	0.074	0.654	1.2512
hsa-miR-22	hsa-miR-146a	0.049	0.667	1.2496
hsa-miR-192	hsa-miR-206	0.063	0.658	1.2474
hsa-miR-29c	hsa-miR-29b	0.554	0.385	1.247
hsa-miR-150	hsa-miR-222	0.093	0.64	1.245
hsa-miR-181b	hsa-miR-221	0.086	0.642	1.2416
hsa-miR-142-5p	hsa-miR-20a	0.025	0.675	1.24
hsa-miR-200a	hsa-miR-221	0.068	0.649	1.2362
hsa-miR-141	hsa-miR-145	0.075	0.645	1.236
hsa-miR-145	hsa-miR-125b	0.065	0.65	1.235
hsa-miR-22	hsa-miR-223	0.129	0.613	1.2324
hsa-miR-206	hsa-miR-34a	0.042	0.661	1.2318
hsa-miR-214	hsa-miR-206	0.049	0.657	1.2316
hsa-miR-203	hsa-miR-20a	0.15	0.6	1.23
hsa-miR-15a	hsa-miR-155	0.088	0.634	1.2292
hsa-miR-223	hsa-miR-24	0.047	0.656	1.2278
hsa-miR-192	hsa-miR-126	0.1	0.625	1.225
hsa-miR-200a	hsa-miR-143	0.059	0.647	1.2236
hsa-miR-143	hsa-miR-200c	0.057	0.648	1.2234
hsa-let-7a	hsa-miR-221	0.082	0.633	1.2214
hsa-miR-20b	hsa-miR-21	0.055	0.648	1.2214
hsa-miR-143	hsa-miR-26a	0.048	0.651	1.2198
hsa-miR-126	hsa-miR-155	0.067	0.64	1.219
hsa-miR-182	hsa-miR-222	0.083	0.631	1.2188
hsa-miR-122	hsa-miR-146a	0.064	0.641	1.2178
hsa-miR-22	hsa-miR-132	0.063	0.641	1.2168
hsa-miR-150	hsa-miR-145	0.091	0.625	1.216
hsa-miR-141	hsa-miR-221	0.073	0.635	1.216
hsa-miR-125b	hsa-miR-155	0.085	0.628	1.2154
hsa-miR-22	hsa-miR-221	0.076	0.633	1.2154
hsa-miR-22	hsa-miR-143	0.099	0.62	1.215
hsa-miR-222	hsa-miR-29b	0.039	0.65	1.209
hsa-miR-132	hsa-miR-181b	0.044	0.647	1.2086
hsa-miR-182	hsa-miR-21	0.099	0.616	1.2078
hsa-miR-145	hsa-miR-34a	0.05	0.642	1.2056
hsa-miR-15b	hsa-miR-21	0.041	0.647	1.2056
hsa-miR-221	hsa-miR-16	0.067	0.632	1.2046
hsa-miR-26a	hsa-miR-145	0.082	0.622	1.2016
hsa-miR-132	hsa-miR-125b	0.041	0.643	1.1984
hsa-miR-218	hsa-miR-206	0.011	0.659	1.1972
hsa-miR-17-5p	hsa-miR-21	0.099	0.61	1.197
hsa-miR-126	hsa-miR-141	0.059	0.632	1.1966
hsa-miR-20b	hsa-miR-200b	0.022	0.652	1.1956
hsa-miR-214	hsa-miR-21	0.043	0.64	1.195
hsa-miR-143	hsa-miR-15b	0.01	0.656	1.1908
hsa-miR-26a	hsa-miR-222	0.045	0.636	1.1898
hsa-miR-181a	hsa-miR-21	0.039	0.638	1.1874
hsa-miR-20a	hsa-miR-15a	0.064	0.624	1.1872
hsa-miR-107	hsa-miR-143	0.038	0.638	1.1864
hsa-miR-20a	hsa-miR-141	0.102	0.602	1.1856
hsa-miR-16-1	hsa-miR-200b	0.057	0.625	1.182
hsa-miR-182	hsa-miR-146a	0.057	0.625	1.182
hsa-miR-106b	hsa-miR-222	0.108	0.595	1.179
hsa-miR-221	hsa-miR-200c	0.054	0.625	1.179
hsa-miR-205	hsa-miR-146a	0.052	0.625	1.177
hsa-miR-146a	hsa-miR-124	0.024	0.64	1.176
hsa-miR-132	hsa-miR-214	0.052	0.623	1.1734
hsa-miR-142-5p	hsa-miR-141	0.014	0.644	1.1732
hsa-miR-24	hsa-miR-143	0.056	0.62	1.172
hsa-miR-192	hsa-miR-20a	0.143	0.571	1.1708
hsa-miR-221	hsa-miR-1	0.084	0.603	1.1694
hsa-miR-200b	hsa-miR-15a	0.067	0.612	1.1686
hsa-miR-203	hsa-miR-24	0.068	0.61	1.166
hsa-miR-143	hsa-miR-205	0.106	0.588	1.1644
hsa-miR-132	hsa-miR-181a	0.079	0.603	1.1644
hsa-miR-181a	hsa-miR-145	0.032	0.628	1.1624
hsa-miR-26b	hsa-miR-146a	0.048	0.619	1.1622
hsa-miR-181b	hsa-miR-20a	0.12	0.578	1.1604
hsa-miR-20b	hsa-miR-221	0.039	0.623	1.1604
hsa-miR-200a	hsa-miR-141	0.357	0.446	1.1598
hsa-miR-23a	hsa-miR-146a	0.034	0.625	1.159
hsa-miR-183	hsa-miR-222	0.053	0.613	1.1564
hsa-miR-24	hsa-miR-200b	0.032	0.624	1.1552
hsa-miR-429	hsa-miR-206	0.038	0.62	1.154
hsa-miR-9	hsa-miR-200c	0.041	0.618	1.1534
hsa-miR-145	hsa-miR-124	0.006	0.637	1.1526
hsa-miR-20a	hsa-miR-16	0.077	0.597	1.1516
hsa-miR-192	hsa-miR-221	0.071	0.6	1.151
hsa-miR-142-5p	hsa-miR-192	0.045	0.614	1.1502
hsa-miR-122	hsa-miR-206	0.045	0.614	1.1502
hsa-miR-17-5p	hsa-miR-223	0.063	0.603	1.1484
hsa-miR-200c	hsa-miR-16	0.048	0.611	1.1478
hsa-miR-142-5p	hsa-miR-221	0	0.636	1.1448
hsa-miR-205	hsa-miR-200b	0.162	0.545	1.143
hsa-miR-125b	hsa-miR-16	0.079	0.591	1.1428
hsa-miR-16-1	hsa-miR-141	0.086	0.586	1.1408
hsa-miR-143	hsa-miR-15a	0.084	0.587	1.1406
hsa-miR-200a	hsa-miR-200c	0.182	0.532	1.1396
hsa-miR-143	hsa-miR-9	0.048	0.606	1.1388
hsa-miR-15b	hsa-miR-206	0.018	0.622	1.1376
hsa-miR-19b	hsa-miR-21	0.032	0.614	1.1372
hsa-miR-20b	hsa-miR-146a	0.039	0.61	1.137
hsa-miR-181b	hsa-miR-200c	0.064	0.596	1.1368
hsa-miR-223	hsa-miR-155	0.107	0.572	1.1366
hsa-miR-125b	hsa-miR-200c	0.031	0.614	1.1362
hsa-let-7a	hsa-miR-141	0.051	0.602	1.1346
hsa-miR-142-5p	hsa-miR-126	0	0.63	1.134
hsa-let-7a	hsa-miR-16	0.079	0.586	1.1338
hsa-miR-19b	hsa-miR-19a	0.615	0.288	1.1334
hsa-miR-34a	hsa-miR-200b	0.067	0.592	1.1326
hsa-miR-142-5p	hsa-miR-143	0	0.629	1.1322
hsa-miR-223	hsa-miR-125b	0.072	0.588	1.1304
hsa-miR-223	hsa-miR-181a	0.077	0.585	1.13
hsa-miR-183	hsa-miR-21	0.062	0.593	1.1294
hsa-let-7a	hsa-miR-9	0.094	0.575	1.129
hsa-miR-205	hsa-miR-145	0.097	0.573	1.1284
hsa-miR-203	hsa-let-7a	0.101	0.57	1.127
hsa-miR-138	hsa-miR-146a	0.064	0.59	1.126
hsa-miR-203	hsa-miR-141	0.037	0.605	1.126
hsa-miR-182	hsa-miR-200b	0.049	0.598	1.1254
hsa-miR-203	hsa-miR-155	0.049	0.598	1.1254
hsa-miR-183	hsa-miR-200b	0.022	0.613	1.1254
hsa-miR-19a	hsa-miR-222	0.077	0.582	1.1246
hsa-miR-16-1	hsa-miR-145	0.123	0.556	1.1238
hsa-miR-29b	hsa-miR-200b	0.034	0.605	1.123
hsa-miR-198	hsa-miR-21	0.026	0.609	1.1222
hsa-miR-135a	hsa-miR-222	0.051	0.595	1.122
hsa-miR-200c	hsa-miR-1	0.04	0.601	1.1218
hsa-miR-222	hsa-miR-221	0.576	0.303	1.1214
hsa-miR-29b	hsa-miR-221	0.048	0.596	1.1208
hsa-miR-142-3p	hsa-miR-21	0.048	0.596	1.1208
hsa-miR-19b	hsa-miR-141	0.012	0.616	1.1208
hsa-miR-198	hsa-miR-206	0.197	0.513	1.1204
hsa-miR-26a	hsa-miR-146a	0.033	0.604	1.1202
hsa-miR-148a	hsa-miR-221	0.013	0.615	1.12
hsa-miR-223	hsa-miR-141	0.048	0.595	1.119
hsa-miR-132	hsa-miR-9	0.031	0.604	1.1182
hsa-miR-181a	hsa-miR-200b	0.031	0.604	1.1182
hsa-miR-203	hsa-miR-221	0.074	0.58	1.118
hsa-miR-192	hsa-miR-132	0	0.621	1.1178
hsa-miR-221	hsa-miR-15a	0.059	0.588	1.1174
hsa-miR-192	hsa-miR-203	0.217	0.5	1.117
hsa-miR-181b	hsa-miR-141	0.049	0.593	1.1164
hsa-miR-181a	hsa-miR-221	0.049	0.593	1.1164
hsa-miR-24	hsa-miR-221	0.065	0.584	1.1162
hsa-miR-150	hsa-let-7a	0.077	0.577	1.1156
hsa-miR-214	hsa-miR-145	0.058	0.587	1.1146
hsa-miR-9	hsa-miR-155	0.069	0.58	1.113
hsa-miR-146a	hsa-let-7b	0.033	0.6	1.113
hsa-miR-148a	hsa-miR-143	0.043	0.594	1.1122
hsa-miR-181b	hsa-miR-145	0.111	0.556	1.1118
hsa-miR-122	hsa-miR-222	0.08	0.573	1.1114
hsa-miR-15b	hsa-miR-200b	0.044	0.593	1.1114
hsa-miR-182	hsa-miR-221	0.094	0.565	1.111
hsa-miR-150	hsa-miR-221	0.063	0.582	1.1106
hsa-miR-23b	hsa-miR-146a	0.048	0.59	1.11
hsa-miR-24	hsa-miR-20a	0.048	0.59	1.11
hsa-miR-34a	hsa-miR-155	0.053	0.587	1.1096
hsa-miR-148a	hsa-miR-200b	0.011	0.609	1.1072
hsa-miR-20b	hsa-miR-223	0	0.615	1.107
hsa-let-7a	hsa-miR-1	0.043	0.591	1.1068
hsa-miR-23a	hsa-miR-21	0.058	0.581	1.1038
hsa-miR-145	hsa-miR-200c	0.032	0.595	1.103
hsa-miR-183	hsa-miR-143	0.028	0.597	1.1026
hsa-miR-23a	hsa-miR-222	0.035	0.593	1.1024
hsa-miR-20b	hsa-miR-203	0.034	0.593	1.1014
hsa-miR-30	hsa-miR-146a	0.03	0.594	1.0992
hsa-miR-19b	hsa-miR-20a	0.067	0.573	1.0984
hsa-miR-20a	hsa-miR-34a	0.082	0.564	1.0972
hsa-miR-26b	hsa-miR-206	0.01	0.604	1.0972
hsa-miR-16-1	hsa-miR-203	0.053	0.579	1.0952
hsa-miR-26b	hsa-miR-21	0.032	0.59	1.094
hsa-miR-205	hsa-miR-206	0.048	0.581	1.0938
hsa-miR-148a	hsa-miR-206	0.035	0.588	1.0934
hsa-miR-183	hsa-miR-206	0.047	0.581	1.0928
hsa-miR-429	hsa-miR-141	0.273	0.455	1.092
hsa-miR-20a	hsa-let-7a	0.078	0.563	1.0914
hsa-miR-9	hsa-miR-221	0.074	0.565	1.091
hsa-miR-30	hsa-miR-21	0.047	0.58	1.091
hsa-miR-106b	hsa-miR-143	0.055	0.575	1.09
hsa-miR-22	hsa-miR-141	0.051	0.577	1.0896
hsa-miR-145	hsa-miR-9	0.024	0.592	1.0896
hsa-miR-132	hsa-miR-1	0.041	0.582	1.0886
hsa-miR-198	hsa-miR-222	0.026	0.59	1.088
hsa-miR-222	hsa-let-7b	0.089	0.554	1.0862
hsa-miR-22	hsa-miR-200b	0.053	0.574	1.0862
hsa-miR-181a	hsa-miR-146a	0.024	0.59	1.086
hsa-miR-223	hsa-miR-9	0.063	0.568	1.0854
hsa-miR-214	hsa-miR-200b	0.028	0.587	1.0846
hsa-miR-107	hsa-miR-21	0.045	0.577	1.0836
hsa-miR-143	hsa-miR-29b	0.097	0.548	1.0834
hsa-miR-214	hsa-miR-143	0.046	0.575	1.081
hsa-miR-16-1	hsa-miR-223	0.164	0.509	1.0802
hsa-miR-132	hsa-miR-203	0	0.6	1.08
hsa-miR-15b	hsa-miR-15a	0.25	0.461	1.0798
hsa-miR-143	hsa-miR-181a	0.068	0.562	1.0796
hsa-miR-429	hsa-miR-200b	0.299	0.433	1.0784
hsa-let-7a	hsa-miR-200c	0.035	0.579	1.0772
hsa-miR-26b	hsa-miR-143	0.038	0.577	1.0766
hsa-miR-192	hsa-miR-24	0.063	0.563	1.0764
hsa-miR-126	hsa-miR-9	0.063	0.563	1.0764
hsa-miR-132	hsa-miR-182	0.041	0.575	1.076
hsa-miR-181b	hsa-miR-146a	0.048	0.571	1.0758
hsa-miR-143	hsa-miR-34a	0.059	0.564	1.0742
hsa-miR-192	hsa-miR-155	0.06	0.563	1.0734
hsa-miR-141	hsa-miR-125b	0.064	0.56	1.072
hsa-miR-30	hsa-miR-155	0.056	0.564	1.0712
hsa-miR-17-5p	hsa-miR-181a	0.034	0.576	1.0708
hsa-miR-200b	hsa-let-7b	0.053	0.565	1.07
hsa-miR-16-1	hsa-miR-155	0.065	0.558	1.0694
hsa-miR-203	hsa-miR-200c	0.053	0.564	1.0682
hsa-miR-22	hsa-miR-155	0.076	0.551	1.0678
hsa-miR-192	hsa-miR-16-1	0.067	0.556	1.0678
hsa-miR-141	hsa-miR-155	0.056	0.562	1.0676
hsa-miR-126	hsa-miR-143	0.153	0.508	1.0674
hsa-miR-429	hsa-miR-146a	0.028	0.577	1.0666
hsa-miR-198	hsa-miR-146a	0.051	0.564	1.0662
hsa-miR-200b	hsa-miR-124	0.017	0.581	1.0628
hsa-miR-126	hsa-miR-182	0.069	0.552	1.0626
hsa-miR-29b	hsa-miR-155	0.06	0.557	1.0626
hsa-miR-205	hsa-miR-221	0.122	0.522	1.0616
hsa-miR-22	hsa-miR-205	0.111	0.528	1.0614
hsa-miR-19a	hsa-miR-21	0.042	0.566	1.0608
hsa-miR-29a	hsa-miR-29b	0.522	0.299	1.0602
hsa-miR-96	hsa-miR-200b	0.07	0.55	1.06
hsa-miR-150	hsa-miR-206	0.057	0.557	1.0596
hsa-miR-126	hsa-miR-145	0.101	0.532	1.0586
hsa-miR-214	hsa-miR-146a	0.043	0.564	1.0582
hsa-miR-148a	hsa-miR-146a	0.039	0.566	1.0578
hsa-miR-200a	hsa-miR-214	0.076	0.545	1.057
hsa-miR-17-5p	hsa-miR-132	0.016	0.578	1.0564
hsa-miR-23b	hsa-miR-21	0.039	0.565	1.056
hsa-miR-29a	hsa-miR-21	0.03	0.569	1.0542
hsa-miR-24	hsa-miR-141	0.026	0.571	1.0538
hsa-miR-142-5p	hsa-miR-17-5p	0	0.585	1.053
hsa-miR-150	hsa-miR-143	0.1	0.529	1.0522
hsa-miR-17-5p	hsa-miR-181b	0.049	0.557	1.0516
hsa-miR-192	hsa-miR-200c	0.074	0.543	1.0514
hsa-miR-138	hsa-miR-222	0.025	0.57	1.051
hsa-miR-20a	hsa-miR-9	0.034	0.564	1.0492
hsa-miR-142-5p	hsa-miR-223	0.016	0.574	1.0492
hsa-miR-429	hsa-miR-143	0.048	0.556	1.0488
hsa-miR-15b	hsa-miR-16	0.252	0.442	1.0476
hsa-miR-15b	hsa-miR-145	0.027	0.566	1.0458
hsa-miR-192	hsa-miR-429	0.077	0.538	1.0454
hsa-miR-19b	hsa-miR-200b	0.03	0.564	1.0452
hsa-miR-20b	hsa-miR-141	0.069	0.542	1.0446
hsa-miR-122	hsa-miR-145	0.092	0.529	1.0442
hsa-miR-17-5p	hsa-miR-20a	0.261	0.435	1.044
hsa-miR-24	hsa-miR-155	0.037	0.559	1.0432
hsa-miR-132	hsa-miR-15a	0.058	0.547	1.0426
hsa-miR-30b	hsa-miR-222	0.064	0.543	1.0414
hsa-miR-218	hsa-miR-146a	0.026	0.564	1.0412
hsa-miR-132	hsa-miR-15b	0.024	0.565	1.041
hsa-miR-182	hsa-miR-206	0.074	0.537	1.0406
hsa-miR-206	hsa-miR-124	0.011	0.571	1.0388
hsa-miR-192	hsa-miR-20b	0.043	0.553	1.0384
hsa-miR-132	hsa-miR-205	0.037	0.556	1.0378
hsa-miR-29c	hsa-miR-21	0.024	0.563	1.0374
hsa-miR-15b	hsa-miR-155	0.038	0.555	1.037
hsa-miR-142-5p	hsa-miR-26b	0	0.576	1.0368
hsa-miR-20a	hsa-miR-125b	0.097	0.522	1.0366
hsa-miR-124	hsa-miR-16	0.039	0.554	1.0362
hsa-miR-106b	hsa-miR-21	0.061	0.541	1.0348
hsa-miR-30b	hsa-miR-146a	0.052	0.546	1.0348
hsa-miR-106b	hsa-miR-132	0.047	0.547	1.0316
hsa-miR-30d	hsa-miR-222	0.043	0.548	1.0294
hsa-miR-429	hsa-miR-21	0.028	0.556	1.0288
hsa-miR-132	hsa-miR-34a	0.032	0.553	1.0274
hsa-miR-124	hsa-miR-155	0.045	0.545	1.026
hsa-miR-20a	hsa-miR-181a	0.023	0.557	1.0256
hsa-miR-16-1	hsa-miR-20a	0.091	0.519	1.0252
hsa-miR-142-5p	hsa-miR-26a	0	0.569	1.0242
hsa-miR-181b	hsa-miR-181a	0.34	0.38	1.024
hsa-miR-132	hsa-miR-200c	0.041	0.546	1.0238
hsa-miR-206	hsa-let-7b	0.039	0.547	1.0236
hsa-miR-195	hsa-miR-15b	0.433	0.328	1.0234
hsa-miR-135a	hsa-miR-21	0.046	0.543	1.0234
hsa-miR-93	hsa-miR-20a	0.211	0.451	1.0228
hsa-miR-24	hsa-miR-125b	0.092	0.517	1.0226
hsa-miR-150	hsa-miR-200b	0.054	0.538	1.0224
hsa-miR-181a	hsa-miR-206	0.033	0.549	1.0212
hsa-miR-200a	hsa-miR-145	0.058	0.535	1.021
hsa-miR-16-1	hsa-miR-200a	0.083	0.521	1.0208
hsa-miR-192	hsa-miR-148a	0.043	0.543	1.0204
hsa-miR-223	hsa-miR-200c	0.03	0.55	1.02
hsa-miR-181a	hsa-miR-141	0.051	0.538	1.0194
hsa-miR-15b	hsa-miR-222	0.063	0.531	1.0188
hsa-miR-20b	hsa-miR-22	0.054	0.536	1.0188
hsa-miR-143	hsa-miR-23a	0.05	0.538	1.0184
hsa-miR-183	hsa-miR-24	0.036	0.545	1.017
hsa-miR-195	hsa-miR-21	0.036	0.545	1.017
hsa-miR-16-1	hsa-miR-181b	0.07	0.526	1.0168
hsa-miR-20b	hsa-miR-206	0.023	0.552	1.0166
hsa-miR-22	hsa-miR-20a	0.084	0.518	1.0164
hsa-miR-126	hsa-miR-1	0.052	0.535	1.015
hsa-miR-7	hsa-miR-222	0.075	0.522	1.0146
hsa-miR-143	hsa-let-7b	0.073	0.523	1.0144
hsa-miR-20b	hsa-miR-125b	0.033	0.544	1.0122
hsa-miR-26b	hsa-miR-145	0.02	0.551	1.0118
hsa-miR-126	hsa-miR-203	0.077	0.519	1.0112
hsa-miR-126	hsa-miR-181a	0.059	0.529	1.0112
hsa-miR-19b	hsa-miR-221	0.059	0.529	1.0112
hsa-miR-15a	hsa-miR-1	0.046	0.536	1.0108
hsa-miR-15b	hsa-miR-125b	0.045	0.536	1.0098
hsa-miR-20b	hsa-miR-145	0.057	0.529	1.0092
hsa-miR-142-5p	hsa-miR-16-1	0	0.56	1.008
hsa-miR-23b	hsa-miR-222	0.063	0.525	1.008
hsa-miR-142-5p	hsa-miR-206	0.012	0.553	1.0074
hsa-miR-200a	hsa-let-7a	0.026	0.545	1.007
hsa-miR-181b	hsa-miR-155	0.042	0.536	1.0068
hsa-miR-203	hsa-miR-16	0.033	0.541	1.0068
hsa-miR-142-3p	hsa-miR-200b	0.056	0.528	1.0064
hsa-miR-138	hsa-miR-143	0.056	0.528	1.0064
hsa-miR-141	hsa-miR-16	0.063	0.524	1.0062
hsa-miR-19b	hsa-miR-146a	0.034	0.54	1.006
hsa-miR-218	hsa-miR-222	0.068	0.521	1.0058
hsa-miR-106b	hsa-miR-221	0.105	0.5	1.005
hsa-miR-106b	hsa-miR-145	0.055	0.527	1.0036
hsa-miR-200a	hsa-miR-181a	0.055	0.527	1.0036
hsa-miR-125b	hsa-miR-1	0.062	0.523	1.0034
hsa-miR-20b	hsa-miR-19b	0.103	0.5	1.003
hsa-miR-15b	hsa-miR-200c	0.045	0.532	1.0026
hsa-miR-122	hsa-miR-223	0.133	0.483	1.0024
hsa-miR-135a	hsa-miR-206	0.033	0.538	1.0014
hsa-miR-142-3p	hsa-miR-146a	0.053	0.526	0.9998
hsa-miR-26a	hsa-miR-155	0.078	0.512	0.9996
hsa-miR-126	hsa-miR-214	0.031	0.538	0.9994
hsa-let-7b	hsa-miR-155	0.04	0.532	0.9976
hsa-miR-142-5p	hsa-miR-22	0	0.554	0.9972
hsa-miR-20a	hsa-miR-15b	0.028	0.538	0.9964
hsa-miR-320	hsa-miR-222	0.038	0.532	0.9956
hsa-miR-30b	hsa-miR-21	0.036	0.533	0.9954
hsa-miR-221	hsa-miR-34a	0.086	0.505	0.995
hsa-miR-122	hsa-miR-200b	0.054	0.522	0.9936
hsa-miR-150	hsa-miR-155	0.07	0.513	0.9934
hsa-miR-132	hsa-miR-26a	0.055	0.521	0.9928
hsa-miR-17-5p	hsa-miR-200a	0.058	0.519	0.9922
hsa-miR-93	hsa-miR-106b	0.311	0.378	0.9914
hsa-miR-20b	hsa-miR-200a	0.039	0.529	0.9912
hsa-miR-429	hsa-miR-221	0.028	0.535	0.991
hsa-miR-16-1	hsa-let-7a	0.053	0.52	0.989
hsa-miR-135a	hsa-miR-200b	0.042	0.526	0.9888
hsa-miR-138	hsa-miR-21	0.04	0.527	0.9886
hsa-miR-16-1	hsa-miR-24	0.038	0.528	0.9884
hsa-miR-148a	hsa-miR-223	0.016	0.54	0.988
hsa-miR-24	hsa-miR-181b	0.016	0.54	0.988
hsa-miR-17-5p	hsa-miR-145	0.068	0.511	0.9878
hsa-miR-107	hsa-miR-206	0.031	0.531	0.9868
hsa-let-7a	hsa-miR-15a	0.045	0.523	0.9864
hsa-miR-22	hsa-miR-24	0.07	0.509	0.9862
hsa-miR-200a	hsa-miR-181b	0.07	0.509	0.9862
hsa-miR-182	hsa-miR-20a	0.077	0.505	0.986
hsa-miR-17-5p	hsa-miR-141	0.039	0.526	0.9858
hsa-miR-146a	hsa-miR-29b	0.058	0.515	0.985
hsa-miR-7	hsa-miR-143	0.098	0.492	0.9836
hsa-miR-183	hsa-miR-145	0.094	0.494	0.9832
hsa-miR-192	hsa-miR-141	0.043	0.522	0.9826
hsa-miR-142-5p	hsa-miR-181b	0.035	0.526	0.9818
hsa-miR-214	hsa-miR-221	0.043	0.521	0.9808
hsa-miR-142-3p	hsa-miR-222	0.068	0.507	0.9806
hsa-miR-122	hsa-miR-126	0.061	0.51	0.979
hsa-miR-22	hsa-miR-16	0.034	0.525	0.979
hsa-miR-20b	hsa-miR-132	0.033	0.525	0.978
hsa-miR-25	hsa-miR-32	0.391	0.326	0.9778
hsa-miR-22	hsa-miR-181b	0.063	0.508	0.9774
hsa-miR-96	hsa-miR-21	0.071	0.503	0.9764
hsa-miR-132	hsa-miR-30	0.024	0.529	0.9762
hsa-miR-143	hsa-miR-124	0.013	0.535	0.976
hsa-miR-141	hsa-miR-9	0.027	0.527	0.9756
hsa-miR-203	hsa-miR-9	0.066	0.505	0.975
hsa-miR-142-3p	hsa-miR-132	0.016	0.532	0.9736
hsa-miR-138	hsa-miR-145	0.033	0.522	0.9726
hsa-miR-192	hsa-miR-181b	0.163	0.449	0.9712
hsa-miR-22	hsa-miR-200a	0.055	0.509	0.9712
hsa-miR-17-5p	hsa-miR-155	0.071	0.5	0.971
hsa-miR-19b	hsa-miR-206	0.042	0.516	0.9708
hsa-miR-142-3p	hsa-miR-143	0.058	0.507	0.9706
hsa-miR-135a	hsa-miR-143	0.013	0.532	0.9706
hsa-miR-142-5p	hsa-miR-155	0.025	0.525	0.97
hsa-miR-98	hsa-let-7a	0.41	0.311	0.9698
hsa-miR-30b	hsa-miR-200b	0.036	0.518	0.9684
hsa-miR-9	hsa-miR-1	0.041	0.515	0.968
hsa-miR-142-3p	hsa-miR-145	0.057	0.506	0.9678
hsa-miR-98	hsa-miR-21	0.039	0.516	0.9678
hsa-miR-200a	hsa-miR-223	0.067	0.5	0.967
hsa-miR-126	hsa-miR-150	0.104	0.479	0.9662
hsa-miR-192	hsa-miR-17-5p	0.085	0.489	0.9652
hsa-miR-22	hsa-miR-203	0.065	0.5	0.965
hsa-miR-200a	hsa-miR-203	0.034	0.517	0.9646
hsa-miR-148a	hsa-miR-203	0.034	0.517	0.9646
hsa-miR-126	hsa-miR-106b	0.082	0.49	0.964
hsa-miR-17-5p	hsa-miR-200c	0.044	0.511	0.9638
hsa-miR-183	hsa-miR-221	0.052	0.506	0.9628
hsa-miR-223	hsa-miR-19b	0.014	0.527	0.9626
hsa-miR-30d	hsa-miR-200b	0.037	0.514	0.9622
hsa-miR-126	hsa-miR-181b	0.096	0.481	0.9618
hsa-miR-24	hsa-miR-145	0.022	0.522	0.9616
hsa-miR-183	hsa-miR-146a	0.038	0.513	0.9614
hsa-miR-126	hsa-miR-200c	0.061	0.5	0.961
hsa-miR-34a	hsa-miR-200c	0.024	0.52	0.96
hsa-miR-320	hsa-miR-143	0.013	0.526	0.9598
hsa-miR-183	hsa-miR-20a	0.117	0.468	0.9594
hsa-miR-26a	hsa-miR-20a	0.088	0.484	0.9592
hsa-miR-429	hsa-miR-200c	0.197	0.423	0.9584
hsa-miR-15b	hsa-miR-141	0.086	0.484	0.9572
hsa-miR-142-5p	hsa-miR-145	0.035	0.512	0.9566
hsa-miR-142-3p	hsa-miR-206	0.035	0.512	0.9566
hsa-miR-320	hsa-miR-21	0.033	0.513	0.9564
hsa-miR-132	hsa-miR-183	0	0.531	0.9558
hsa-miR-203	hsa-miR-223	0.043	0.507	0.9556
hsa-miR-20a	hsa-miR-29b	0.046	0.505	0.955
hsa-miR-16-1	hsa-miR-17-5p	0.038	0.509	0.9542
hsa-miR-222	hsa-miR-29a	0.054	0.5	0.954
hsa-miR-222	hsa-miR-124	0	0.53	0.954
hsa-miR-429	hsa-miR-126	0.077	0.487	0.9536
hsa-miR-7	hsa-miR-145	0.075	0.488	0.9534
hsa-miR-214	hsa-miR-200c	0.028	0.514	0.9532
hsa-miR-132	hsa-miR-23a	0.028	0.514	0.9532
hsa-miR-142-5p	hsa-miR-24	0.019	0.519	0.9532
hsa-miR-200a	hsa-miR-205	0.233	0.4	0.953
hsa-miR-106b	hsa-miR-206	0.033	0.511	0.9528
hsa-miR-27a	hsa-miR-222	0.022	0.517	0.9526
hsa-let-7a	hsa-miR-125b	0.112	0.467	0.9526
hsa-miR-26b	hsa-miR-26a	0.52	0.24	0.952
hsa-miR-192	hsa-miR-200a	0.091	0.477	0.9496
hsa-let-7a	hsa-let-7b	0.305	0.358	0.9494
hsa-miR-10a	hsa-miR-146a	0.026	0.513	0.9494
hsa-miR-143	hsa-miR-96	0.049	0.5	0.949
hsa-miR-30b	hsa-miR-206	0.057	0.495	0.948
hsa-miR-145	hsa-let-7b	0.054	0.496	0.9468
hsa-miR-320	hsa-miR-146a	0.024	0.512	0.9456
hsa-miR-30d	hsa-miR-21	0.024	0.512	0.9456
hsa-miR-26b	hsa-miR-223	0.058	0.493	0.9454
hsa-miR-107	hsa-miR-200c	0.063	0.49	0.945
hsa-miR-9	hsa-miR-125b	0.075	0.483	0.9444
hsa-miR-26b	hsa-miR-132	0.044	0.5	0.944
hsa-miR-126	hsa-miR-22	0.08	0.48	0.944
hsa-miR-22	hsa-let-7a	0.09	0.474	0.9432
hsa-miR-198	hsa-miR-200b	0.043	0.5	0.943
hsa-miR-30c	hsa-miR-146a	0.043	0.5	0.943
hsa-miR-143	hsa-let-7c	0.023	0.511	0.9428
hsa-miR-24	hsa-miR-200c	0.033	0.505	0.942
hsa-miR-96	hsa-miR-222	0.096	0.47	0.942
hsa-miR-138	hsa-miR-206	0.022	0.511	0.9418
hsa-miR-106b	hsa-miR-141	0.052	0.494	0.9412
hsa-miR-320	hsa-miR-200b	0.032	0.505	0.941
hsa-miR-203	hsa-miR-26a	0.027	0.507	0.9396
hsa-miR-16-1	hsa-miR-181a	0.055	0.491	0.9388
hsa-miR-214	hsa-miR-223	0.038	0.5	0.938
hsa-miR-192	hsa-miR-223	0.053	0.491	0.9368
hsa-miR-148a	hsa-miR-145	0.058	0.488	0.9364
hsa-miR-20b	hsa-miR-142-3p	0.019	0.509	0.9352
hsa-miR-183	hsa-miR-200c	0.045	0.494	0.9342
hsa-miR-142-5p	hsa-let-7a	0	0.519	0.9342
hsa-miR-138	hsa-miR-200b	0.043	0.495	0.934
hsa-miR-34a	hsa-miR-16	0.044	0.493	0.9314
hsa-miR-96	hsa-miR-146a	0.022	0.505	0.931
hsa-miR-182	hsa-miR-143	0.075	0.475	0.93
hsa-miR-181b	hsa-miR-26a	0.041	0.493	0.9284
hsa-miR-214	hsa-miR-181b	0.039	0.494	0.9282
hsa-let-7c	hsa-miR-200b	0.037	0.495	0.928
hsa-miR-200a	hsa-miR-155	0.051	0.487	0.9276
hsa-miR-135a	hsa-miR-132	0.015	0.507	0.9276
hsa-miR-16-1	hsa-miR-26a	0.117	0.45	0.927
hsa-miR-122	hsa-miR-24	0.093	0.463	0.9264
hsa-miR-200c	hsa-miR-15a	0.042	0.491	0.9258
hsa-miR-132	hsa-miR-96	0.013	0.507	0.9256
hsa-miR-107	hsa-miR-146a	0.047	0.488	0.9254
hsa-miR-141	hsa-miR-15a	0.074	0.473	0.9254
hsa-miR-106b	hsa-miR-200b	0.054	0.484	0.9252
hsa-miR-214	hsa-let-7a	0.054	0.484	0.9252
hsa-miR-203	hsa-miR-15a	0.044	0.489	0.9242
hsa-miR-181b	hsa-miR-1	0.029	0.497	0.9236
hsa-miR-132	hsa-miR-29b	0.034	0.494	0.9232
hsa-miR-9	hsa-miR-16	0.059	0.48	0.923
hsa-miR-126	hsa-miR-24	0.041	0.49	0.923
hsa-miR-30	hsa-miR-145	0.055	0.482	0.9226
hsa-miR-19a	hsa-miR-146a	0.031	0.495	0.922
hsa-miR-29c	hsa-miR-200b	0.047	0.486	0.9218
hsa-miR-429	hsa-miR-181b	0.038	0.491	0.9218
hsa-miR-218	hsa-miR-21	0.027	0.497	0.9216
hsa-miR-26a	hsa-miR-200c	0.039	0.49	0.921
hsa-miR-142-5p	hsa-miR-125b	0	0.511	0.9198
hsa-miR-200a	hsa-miR-26a	0.063	0.476	0.9198
hsa-miR-137	hsa-miR-200b	0.01	0.505	0.919
hsa-miR-30	hsa-miR-200b	0.035	0.491	0.9188
hsa-miR-206	hsa-miR-29b	0.026	0.496	0.9188
hsa-miR-192	hsa-let-7a	0.071	0.471	0.9188
hsa-miR-143	hsa-miR-29c	0.071	0.471	0.9188
hsa-miR-126	hsa-miR-34a	0.064	0.474	0.9172
hsa-miR-148a	hsa-miR-9	0.06	0.476	0.9168
hsa-miR-192	hsa-miR-26a	0.016	0.5	0.916
hsa-miR-132	hsa-miR-24	0.016	0.5	0.916
hsa-miR-429	hsa-miR-145	0.037	0.488	0.9154
hsa-miR-135a	hsa-miR-146a	0.049	0.481	0.9148
hsa-miR-27a	hsa-miR-146a	0.033	0.489	0.9132
hsa-miR-122	hsa-miR-16-1	0.12	0.44	0.912
hsa-miR-16-1	hsa-miR-126	0.116	0.442	0.9116
hsa-miR-148a	hsa-miR-200c	0.022	0.494	0.9112
hsa-miR-20b	hsa-miR-155	0.044	0.481	0.9098
hsa-miR-192	hsa-miR-182	0.088	0.456	0.9088
hsa-miR-29c	hsa-miR-222	0.079	0.461	0.9088
hsa-miR-126	hsa-miR-125b	0.086	0.457	0.9086
hsa-miR-126	hsa-miR-205	0.077	0.462	0.9086
hsa-miR-200a	hsa-miR-20a	0.077	0.462	0.9086
hsa-miR-192	hsa-miR-22	0.08	0.46	0.908
hsa-miR-126	hsa-miR-27a	0.069	0.466	0.9078
hsa-miR-30b	hsa-miR-221	0.085	0.457	0.9076
hsa-miR-122	hsa-miR-192	0.083	0.458	0.9074
hsa-miR-30	hsa-miR-222	0.074	0.463	0.9074
hsa-miR-203	hsa-miR-182	0.072	0.464	0.9072
hsa-miR-122	hsa-miR-143	0.07	0.465	0.907
hsa-miR-141	hsa-miR-1	0.032	0.486	0.9068
hsa-miR-182	hsa-miR-155	0.066	0.467	0.9066
hsa-miR-19b	hsa-miR-155	0.017	0.494	0.9062
hsa-miR-26a	hsa-miR-221	0.056	0.472	0.9056
hsa-miR-19a	hsa-miR-200b	0.056	0.472	0.9056
hsa-miR-148a	hsa-miR-20a	0.063	0.468	0.9054
hsa-miR-372	hsa-miR-21	0.054	0.473	0.9054
hsa-miR-29b	hsa-miR-125b	0.052	0.474	0.9052
hsa-miR-98	hsa-miR-222	0.05	0.475	0.905
hsa-miR-24	hsa-miR-16	0.046	0.477	0.9046
hsa-miR-429	hsa-miR-20a	0.04	0.48	0.904
hsa-miR-126	hsa-miR-25	0.038	0.481	0.9038
hsa-miR-20b	hsa-miR-15a	0.038	0.481	0.9038
hsa-miR-17-5p	hsa-miR-150	0.034	0.483	0.9034
hsa-miR-141	hsa-miR-29b	0.039	0.48	0.903
hsa-miR-27b	hsa-miR-206	0.03	0.485	0.903
hsa-miR-181b	hsa-miR-9	0.021	0.49	0.903
hsa-miR-106b	hsa-miR-146a	0.037	0.481	0.9028
hsa-miR-142-5p	hsa-miR-132	0.017	0.492	0.9026
hsa-miR-26b	hsa-miR-222	0.024	0.488	0.9024
hsa-miR-195	hsa-miR-16	0.238	0.369	0.9022
hsa-miR-143	hsa-miR-30d	0.022	0.489	0.9022
hsa-miR-200a	hsa-miR-148a	0.02	0.49	0.902
hsa-miR-126	hsa-miR-16	0.061	0.467	0.9016
hsa-miR-17-5p	hsa-miR-125b	0.08	0.455	0.899
hsa-miR-30c	hsa-miR-206	0.061	0.465	0.898
hsa-miR-145	hsa-miR-29b	0.052	0.47	0.898
hsa-miR-203	hsa-miR-181b	0.131	0.426	0.8978
hsa-miR-96	hsa-miR-145	0.071	0.459	0.8972
hsa-miR-192	hsa-miR-34a	0.078	0.455	0.897
hsa-miR-150	hsa-miR-141	0.066	0.461	0.8958
hsa-miR-122	hsa-miR-221	0.064	0.462	0.8956
hsa-miR-200a	hsa-miR-9	0.047	0.471	0.8948
hsa-miR-20a	hsa-miR-30	0.038	0.476	0.8948
hsa-miR-27b	hsa-miR-146a	0.045	0.472	0.8946
hsa-miR-142-3p	hsa-miR-141	0.055	0.466	0.8938
hsa-miR-150	hsa-miR-223	0.078	0.453	0.8934
hsa-miR-27a	hsa-miR-221	0.022	0.484	0.8932
hsa-miR-23a	hsa-miR-221	0.034	0.477	0.8926
hsa-miR-17-5p	hsa-miR-203	0.068	0.458	0.8924
hsa-miR-148a	hsa-let-7a	0.039	0.474	0.8922
hsa-miR-181a	hsa-miR-155	0.03	0.479	0.8922
hsa-miR-143	hsa-miR-19b	0.025	0.481	0.8908
hsa-miR-195	hsa-miR-200b	0.077	0.452	0.8906
hsa-miR-101	hsa-miR-146a	0.012	0.488	0.8904
hsa-let-7a	hsa-miR-124	0.012	0.488	0.8904
hsa-miR-200c	hsa-let-7b	0.046	0.469	0.8902
hsa-miR-132	hsa-miR-19b	0.028	0.479	0.8902
hsa-miR-205	hsa-miR-20a	0.071	0.455	0.89
hsa-miR-7	hsa-miR-132	0.056	0.463	0.8894
hsa-miR-16-1	hsa-miR-106b	0.056	0.463	0.8894
hsa-miR-142-5p	hsa-miR-34a	0	0.494	0.8892
hsa-miR-26a	hsa-miR-200b	0.059	0.461	0.8888
hsa-miR-198	hsa-miR-132	0.032	0.476	0.8888
hsa-miR-16-1	hsa-miR-19b	0.033	0.475	0.888
hsa-miR-10a	hsa-miR-223	0.033	0.475	0.888
hsa-miR-29b	hsa-miR-1	0.031	0.476	0.8878
hsa-miR-30c	hsa-miR-200b	0.038	0.472	0.8876
hsa-miR-22	hsa-miR-1	0.036	0.473	0.8874
hsa-miR-152	hsa-miR-222	0	0.493	0.8874
hsa-miR-203	hsa-miR-125b	0.064	0.457	0.8866
hsa-miR-148a	hsa-miR-181b	0.017	0.483	0.8864
hsa-miR-429	hsa-miR-17-5p	0.043	0.468	0.8854
hsa-miR-24	hsa-miR-34a	0.059	0.459	0.8852
hsa-miR-137	hsa-miR-21	0.012	0.485	0.885
hsa-miR-126	hsa-miR-320	0.019	0.481	0.8848
hsa-miR-181b	hsa-miR-16	0.044	0.467	0.8846
hsa-miR-148a	hsa-miR-125b	0.045	0.466	0.8838
hsa-miR-16-1	hsa-miR-205	0.104	0.433	0.8834
hsa-miR-23b	hsa-miR-206	0.032	0.473	0.8834
hsa-miR-122	hsa-miR-20a	0.035	0.471	0.8828
hsa-miR-138	hsa-miR-20a	0.035	0.471	0.8828
hsa-miR-29c	hsa-miR-29a	0.625	0.143	0.8824
hsa-miR-429	hsa-miR-20b	0.022	0.478	0.8824
hsa-miR-142-5p	hsa-miR-20b	0	0.49	0.882
hsa-miR-223	hsa-miR-16	0.061	0.456	0.8818
hsa-miR-148a	hsa-miR-155	0.038	0.468	0.8804
hsa-miR-183	hsa-miR-182	0.097	0.435	0.88
hsa-miR-7	hsa-miR-221	0.057	0.457	0.8796
hsa-miR-20a	hsa-miR-19a	0.082	0.443	0.8794
hsa-miR-16-1	hsa-miR-16	0.065	0.452	0.8786
hsa-miR-181b	hsa-miR-15a	0.036	0.468	0.8784
hsa-miR-106b	hsa-miR-17-5p	0.111	0.426	0.8778
hsa-miR-30	hsa-miR-16	0.046	0.462	0.8776
hsa-miR-20b	hsa-miR-17-5p	0.143	0.408	0.8774
hsa-miR-214	hsa-miR-141	0.056	0.456	0.8768
hsa-miR-203	hsa-miR-1	0.029	0.471	0.8768
hsa-miR-26b	hsa-miR-155	0.036	0.467	0.8766
hsa-miR-30c	hsa-miR-21	0.03	0.47	0.876
hsa-miR-143	hsa-miR-30b	0.044	0.462	0.8756
hsa-miR-29a	hsa-miR-221	0.042	0.463	0.8754
hsa-miR-223	hsa-miR-34a	0.031	0.469	0.8752
hsa-miR-30d	hsa-miR-146a	0.031	0.469	0.8752
hsa-miR-19a	hsa-miR-141	0.021	0.474	0.8742
hsa-miR-106b	hsa-miR-24	0.071	0.446	0.8738
hsa-miR-142-3p	hsa-miR-20a	0.076	0.443	0.8734
hsa-miR-142-5p	hsa-miR-200c	0.047	0.459	0.8732
hsa-miR-223	hsa-miR-26a	0.097	0.431	0.8728
hsa-miR-9	hsa-miR-15a	0.055	0.454	0.8722
hsa-miR-16-1	hsa-miR-200c	0.022	0.472	0.8716
hsa-miR-192	hsa-miR-138	0.083	0.438	0.8714
hsa-miR-214	hsa-miR-1	0.011	0.478	0.8714
hsa-miR-142-5p	hsa-miR-203	0.036	0.464	0.8712
hsa-miR-16-1	hsa-miR-34a	0.036	0.464	0.8712
hsa-let-7a	hsa-miR-34a	0.036	0.464	0.8712
hsa-miR-22	hsa-miR-26a	0.123	0.415	0.87
hsa-miR-16-1	hsa-miR-183	0.038	0.462	0.8696
hsa-miR-126	hsa-miR-138	0.061	0.449	0.8692
hsa-miR-135a	hsa-miR-221	0.012	0.476	0.8688
hsa-miR-126	hsa-miR-135a	0.019	0.472	0.8686
hsa-miR-214	hsa-miR-203	0.026	0.468	0.8684
hsa-miR-96	hsa-miR-20a	0.089	0.433	0.8684
hsa-miR-126	hsa-let-7a	0.071	0.443	0.8684
hsa-let-7c	hsa-let-7a	0.276	0.329	0.8682
hsa-miR-429	hsa-miR-181a	0.04	0.46	0.868
hsa-miR-20a	hsa-let-7b	0.04	0.46	0.868
hsa-miR-223	hsa-miR-181b	0.074	0.441	0.8678
hsa-miR-16-1	hsa-miR-15b	0.027	0.467	0.8676
hsa-miR-16-1	hsa-miR-15a	0.227	0.355	0.866
hsa-miR-200a	hsa-miR-125b	0.07	0.442	0.8656
hsa-miR-24	hsa-miR-9	0.07	0.442	0.8656
hsa-miR-16-1	hsa-miR-214	0.044	0.456	0.8648
hsa-miR-218	hsa-miR-200b	0.044	0.456	0.8648
hsa-miR-9	hsa-miR-29b	0.044	0.456	0.8648
hsa-miR-26b	hsa-miR-200c	0.02	0.469	0.8642
hsa-miR-9	hsa-let-7b	0.072	0.44	0.864
hsa-miR-137	hsa-miR-146a	0.034	0.461	0.8638
hsa-miR-107	hsa-miR-222	0.086	0.432	0.8636
hsa-miR-25	hsa-miR-20a	0.059	0.447	0.8636
hsa-miR-221	hsa-let-7b	0.088	0.43	0.862
hsa-miR-22	hsa-miR-17-5p	0.089	0.429	0.8612
hsa-miR-22	hsa-miR-15a	0.085	0.431	0.8608
hsa-miR-19a	hsa-miR-206	0.038	0.457	0.8606
hsa-miR-17-5p	hsa-miR-25	0.07	0.439	0.8602
hsa-miR-218	hsa-miR-221	0.067	0.44	0.859
hsa-miR-198	hsa-miR-221	0.038	0.456	0.8588
hsa-miR-26b	hsa-miR-148a	0.034	0.458	0.8584
hsa-miR-200a	hsa-miR-150	0.096	0.423	0.8574
hsa-miR-181a	hsa-miR-16	0.022	0.464	0.8572
hsa-miR-19b	hsa-miR-125b	0.02	0.465	0.857
hsa-miR-7	hsa-miR-223	0.054	0.446	0.8568
hsa-miR-205	hsa-miR-155	0.069	0.437	0.8556
hsa-miR-183	hsa-miR-141	0.013	0.468	0.8554
hsa-miR-20b	hsa-miR-19a	0.072	0.435	0.855
hsa-miR-25	hsa-miR-145	0.01	0.469	0.8542
hsa-miR-320	hsa-miR-206	0.033	0.456	0.8538
hsa-miR-198	hsa-miR-155	0.031	0.457	0.8536
hsa-miR-22	hsa-miR-9	0.022	0.462	0.8536
hsa-miR-148a	hsa-miR-141	0.013	0.467	0.8536
hsa-miR-19b	hsa-miR-16	0.011	0.468	0.8534
hsa-miR-27b	hsa-miR-222	0.034	0.455	0.853
hsa-miR-20b	hsa-miR-195	0.059	0.441	0.8528
hsa-miR-143	hsa-miR-195	0.046	0.448	0.8524
hsa-miR-16-1	hsa-miR-9	0.023	0.46	0.851
hsa-let-7c	hsa-miR-206	0.039	0.451	0.8508
hsa-miR-373	hsa-miR-222	0.035	0.453	0.8504
hsa-miR-25	hsa-miR-222	0.092	0.421	0.8498
hsa-miR-223	hsa-miR-30b	0.036	0.452	0.8496
hsa-miR-214	hsa-miR-155	0.046	0.446	0.8488
hsa-miR-24	hsa-miR-1	0.037	0.451	0.8488
hsa-miR-19a	hsa-miR-155	0.028	0.456	0.8488
hsa-miR-183	hsa-miR-203	0.17	0.377	0.8486
hsa-miR-192	hsa-miR-142-3p	0.089	0.422	0.8486
hsa-miR-107	hsa-miR-9	0.042	0.448	0.8484
hsa-miR-126	hsa-miR-218	0.065	0.435	0.848
hsa-miR-138	hsa-miR-221	0.038	0.45	0.848
hsa-miR-183	hsa-miR-155	0.038	0.45	0.848
hsa-miR-181a	hsa-miR-15b	0.025	0.457	0.8476
hsa-miR-223	hsa-miR-1	0.053	0.441	0.8468
hsa-miR-122	hsa-miR-132	0.015	0.462	0.8466
hsa-let-7a	hsa-miR-29b	0.079	0.426	0.8458
hsa-miR-29c	hsa-miR-146a	0.021	0.458	0.8454
hsa-miR-132	hsa-miR-148a	0.051	0.441	0.8448
hsa-miR-7	hsa-miR-126	0.132	0.395	0.843
hsa-miR-27b	hsa-miR-200b	0.049	0.441	0.8428
hsa-miR-182	hsa-miR-181b	0.056	0.437	0.8426
hsa-miR-142-3p	hsa-miR-155	0.038	0.447	0.8426
hsa-miR-218	hsa-miR-145	0.011	0.462	0.8426
hsa-miR-20b	hsa-miR-181b	0	0.468	0.8424
hsa-miR-181b	hsa-let-7a	0.073	0.427	0.8416
hsa-miR-132	hsa-miR-107	0.043	0.443	0.8404
hsa-miR-23b	hsa-miR-200b	0.031	0.449	0.8392
hsa-miR-126	hsa-miR-15a	0.056	0.435	0.839
hsa-miR-15b	hsa-miR-9	0.065	0.43	0.839
hsa-miR-22	hsa-miR-148a	0.018	0.456	0.8388
hsa-miR-142-3p	hsa-miR-17-5p	0.057	0.434	0.8382
hsa-miR-30d	hsa-miR-221	0.053	0.436	0.8378
hsa-miR-29b	hsa-miR-16	0.035	0.446	0.8378
hsa-miR-30c	hsa-miR-30b	0.704	0.074	0.8372
hsa-miR-30b	hsa-miR-145	0.036	0.445	0.837
hsa-miR-22	hsa-miR-200c	0.043	0.441	0.8368
hsa-miR-143	hsa-miR-373	0.012	0.458	0.8364
hsa-miR-20b	hsa-miR-1	0.024	0.451	0.8358
hsa-miR-7	hsa-miR-21	0.058	0.432	0.8356
hsa-miR-30d	hsa-miR-206	0.049	0.437	0.8356
hsa-miR-203	hsa-miR-34a	0.067	0.427	0.8356
hsa-miR-203	hsa-miR-205	0.038	0.443	0.8354
hsa-miR-132	hsa-miR-98	0.045	0.439	0.8352
hsa-miR-20b	hsa-let-7a	0.039	0.442	0.8346
hsa-miR-128a	hsa-miR-146a	0.012	0.457	0.8346
hsa-miR-200a	hsa-miR-183	0.019	0.453	0.8344
hsa-miR-142-3p	hsa-miR-221	0.053	0.434	0.8342
hsa-miR-182	hsa-let-7a	0.069	0.425	0.834
hsa-miR-192	hsa-miR-183	0.22	0.341	0.8338
hsa-miR-205	hsa-miR-200c	0.153	0.378	0.8334
hsa-miR-320	hsa-miR-132	0	0.463	0.8334
hsa-miR-29b	hsa-miR-200c	0.034	0.444	0.8332
hsa-miR-20a	hsa-miR-124	0.012	0.456	0.8328
hsa-miR-135b	hsa-miR-135a	0.541	0.162	0.8326
hsa-miR-27b	hsa-miR-221	0.033	0.444	0.8322
hsa-miR-26a	hsa-miR-9	0.04	0.44	0.832
hsa-miR-16-1	hsa-miR-148a	0.02	0.451	0.8318
hsa-miR-19b	hsa-miR-200c	0.052	0.433	0.8314
hsa-miR-16-1	hsa-miR-1	0.037	0.441	0.8308
hsa-miR-19a	hsa-miR-221	0.064	0.426	0.8308
hsa-let-7e	hsa-let-7a	0.35	0.267	0.8306
hsa-miR-25	hsa-miR-143	0.026	0.447	0.8306
hsa-miR-126	hsa-miR-183	0.042	0.438	0.8304
hsa-miR-223	hsa-miR-15b	0.047	0.435	0.83
hsa-miR-200c	hsa-miR-124	0.011	0.455	0.83
hsa-miR-218	hsa-miR-132	0.016	0.452	0.8296
hsa-miR-22	hsa-miR-125b	0.077	0.418	0.8294
hsa-miR-27a	hsa-miR-206	0.03	0.444	0.8292
hsa-miR-214	hsa-miR-16	0.042	0.437	0.8286
hsa-miR-7	hsa-miR-146a	0.042	0.437	0.8286
hsa-miR-373	hsa-miR-206	0.031	0.443	0.8284
hsa-miR-142-5p	hsa-miR-9	0.036	0.44	0.828
hsa-miR-29a	hsa-miR-200b	0.027	0.445	0.828
hsa-miR-24	hsa-miR-25	0.07	0.421	0.8278
hsa-miR-195	hsa-miR-155	0.052	0.431	0.8278
hsa-miR-195	hsa-miR-222	0.079	0.416	0.8278
hsa-miR-141	hsa-miR-34a	0.037	0.439	0.8272
hsa-miR-19b	hsa-miR-15a	0.028	0.444	0.8272
hsa-miR-24	hsa-miR-181a	0.017	0.45	0.827
hsa-miR-122	hsa-let-7a	0.078	0.416	0.8268
hsa-miR-17-5p	hsa-miR-1	0.049	0.432	0.8266
hsa-miR-126	hsa-miR-148a	0.043	0.435	0.826
hsa-miR-7	hsa-miR-206	0.051	0.43	0.825
hsa-miR-223	hsa-miR-29b	0.033	0.44	0.825
hsa-miR-372	hsa-miR-222	0.11	0.397	0.8246
hsa-miR-20b	hsa-miR-181a	0	0.458	0.8244
hsa-miR-429	hsa-miR-16-1	0.07	0.419	0.8242
hsa-miR-125b	hsa-miR-15a	0.061	0.424	0.8242
hsa-miR-181b	hsa-miR-30d	0.052	0.429	0.8242
hsa-miR-429	hsa-miR-9	0.025	0.444	0.8242
hsa-miR-192	hsa-miR-16	0.048	0.431	0.8238
hsa-miR-198	hsa-miR-145	0.044	0.433	0.8234
hsa-miR-150	hsa-miR-9	0.044	0.433	0.8234
hsa-miR-195	hsa-miR-15a	0.283	0.3	0.823
hsa-miR-34a	hsa-miR-125b	0.067	0.42	0.823
hsa-miR-20b	hsa-miR-200c	0.011	0.451	0.8228
hsa-miR-17-5p	hsa-miR-16	0.04	0.434	0.8212
hsa-miR-429	hsa-miR-148a	0.022	0.444	0.8212
hsa-miR-137	hsa-miR-222	0	0.456	0.8208
hsa-miR-372	hsa-miR-20a	0.158	0.368	0.8204
hsa-miR-181b	hsa-miR-125b	0.041	0.433	0.8204
hsa-miR-183	hsa-miR-223	0.048	0.429	0.8202
hsa-miR-23a	hsa-miR-155	0.048	0.429	0.8202
hsa-miR-132	hsa-miR-25	0.03	0.439	0.8202
hsa-miR-148a	hsa-miR-24	0.058	0.423	0.8194
hsa-miR-143	hsa-miR-30	0.066	0.418	0.8184
hsa-miR-98	hsa-miR-146a	0.049	0.427	0.8176
hsa-miR-22	hsa-miR-181a	0.067	0.417	0.8176
hsa-miR-192	hsa-miR-1	0.038	0.433	0.8174
hsa-miR-19b	hsa-miR-15b	0.011	0.448	0.8174
hsa-miR-142-5p	hsa-miR-15b	0.014	0.446	0.8168
hsa-miR-135a	hsa-miR-145	0.021	0.442	0.8166
hsa-let-7c	hsa-miR-146a	0.021	0.442	0.8166
hsa-miR-98	hsa-miR-206	0.033	0.435	0.816
hsa-let-7c	hsa-miR-222	0.056	0.422	0.8156
hsa-miR-192	hsa-miR-150	0.039	0.431	0.8148
hsa-let-7b	hsa-miR-1	0.039	0.431	0.8148
hsa-miR-126	hsa-miR-15b	0.028	0.437	0.8146
hsa-miR-30	hsa-let-7a	0.04	0.43	0.814
hsa-miR-23a	hsa-miR-125b	0.061	0.418	0.8134
hsa-miR-15b	hsa-let-7a	0.061	0.418	0.8134
hsa-miR-126	hsa-miR-96	0.033	0.433	0.8124
hsa-miR-373	hsa-miR-146a	0.058	0.419	0.8122
hsa-miR-150	hsa-miR-20a	0.047	0.424	0.8102
hsa-miR-223	hsa-let-7b	0.038	0.429	0.8102
hsa-miR-106b	hsa-miR-155	0.043	0.426	0.8098
hsa-miR-183	hsa-miR-1	0.03	0.433	0.8094
hsa-miR-142-5p	hsa-miR-214	0.03	0.433	0.8094
hsa-miR-183	hsa-miR-26a	0.03	0.433	0.8094
hsa-miR-142-3p	hsa-miR-126	0.089	0.4	0.809
hsa-miR-429	hsa-miR-155	0.026	0.435	0.809
hsa-miR-223	hsa-miR-15a	0.114	0.386	0.8088
hsa-miR-26b	hsa-miR-9	0.065	0.413	0.8084
hsa-miR-27a	hsa-miR-200b	0.029	0.433	0.8084
hsa-miR-29c	hsa-miR-221	0.054	0.419	0.8082
hsa-miR-182	hsa-miR-24	0.045	0.424	0.8082
hsa-miR-198	hsa-miR-24	0.036	0.429	0.8082
hsa-miR-148a	hsa-miR-34a	0.036	0.429	0.8082
hsa-miR-429	hsa-miR-223	0.055	0.418	0.8074
hsa-miR-195	hsa-miR-206	0.019	0.438	0.8074
hsa-miR-320	hsa-miR-145	0.011	0.442	0.8066
hsa-miR-23b	hsa-miR-221	0.074	0.407	0.8066
hsa-miR-181b	hsa-miR-34a	0.021	0.436	0.8058
hsa-miR-23a	hsa-miR-200b	0.029	0.431	0.8048
hsa-miR-372	hsa-miR-143	0.07	0.408	0.8044
hsa-miR-26a	hsa-let-7a	0.068	0.409	0.8042
hsa-miR-138	hsa-miR-181b	0.032	0.429	0.8042
hsa-miR-142-3p	hsa-miR-223	0.066	0.41	0.804
hsa-miR-106b	hsa-miR-203	0.066	0.41	0.804
hsa-miR-20b	hsa-miR-24	0.037	0.426	0.8038
hsa-miR-214	hsa-miR-20a	0.062	0.412	0.8036
hsa-miR-181b	hsa-miR-205	0.051	0.418	0.8034
hsa-miR-106b	hsa-miR-16	0.04	0.424	0.8032
hsa-miR-132	hsa-miR-19a	0.038	0.425	0.803
hsa-miR-142-5p	hsa-miR-181a	0	0.446	0.8028
hsa-miR-16-1	hsa-miR-125b	0.07	0.407	0.8026
hsa-miR-143	hsa-miR-29a	0.057	0.414	0.8022
hsa-miR-122	hsa-miR-181b	0.048	0.419	0.8022
hsa-miR-183	hsa-miR-181b	0.189	0.34	0.801
hsa-miR-198	hsa-miR-203	0.068	0.407	0.8006
hsa-miR-142-5p	hsa-miR-372	0.019	0.434	0.8002
hsa-miR-200a	hsa-miR-19b	0	0.444	0.7992
hsa-miR-181a	hsa-miR-200c	0.032	0.426	0.7988
hsa-miR-98	hsa-miR-143	0.082	0.397	0.7966
hsa-miR-29c	hsa-miR-155	0.028	0.427	0.7966
hsa-miR-138	hsa-miR-200c	0.044	0.418	0.7964
hsa-miR-142-5p	hsa-miR-107	0.017	0.433	0.7964
hsa-miR-26b	hsa-miR-200a	0.017	0.433	0.7964
hsa-miR-429	hsa-miR-22	0.04	0.42	0.796
hsa-miR-15b	hsa-miR-221	0.04	0.42	0.796
hsa-miR-181a	hsa-miR-9	0.022	0.43	0.796
hsa-miR-122	hsa-miR-200c	0.056	0.411	0.7958
hsa-miR-181b	hsa-miR-15b	0.036	0.422	0.7956
hsa-miR-142-5p	hsa-let-7b	0	0.442	0.7956
hsa-miR-372	hsa-miR-106b	0.196	0.333	0.7954
hsa-miR-30d	hsa-miR-145	0.028	0.426	0.7948
hsa-miR-26b	hsa-miR-20a	0.022	0.429	0.7942
hsa-miR-22	hsa-miR-34a	0.045	0.416	0.7938
hsa-miR-181b	hsa-miR-30b	0.05	0.413	0.7934
hsa-miR-138	hsa-miR-24	0.035	0.421	0.7928
hsa-miR-126	hsa-miR-19b	0.017	0.431	0.7928
hsa-miR-20b	hsa-miR-205	0.042	0.417	0.7926
hsa-miR-198	hsa-miR-143	0.042	0.417	0.7926
hsa-miR-23a	hsa-miR-206	0.031	0.423	0.7924
hsa-let-7c	hsa-miR-200c	0.038	0.419	0.7922
hsa-miR-221	hsa-miR-124	0	0.44	0.792
hsa-miR-7	hsa-miR-17-5p	0.064	0.404	0.7912
hsa-miR-372	hsa-miR-132	0.015	0.431	0.7908
hsa-miR-16-1	hsa-miR-96	0.015	0.431	0.7908
hsa-miR-17-5p	hsa-miR-19b	0.065	0.403	0.7904
hsa-miR-192	hsa-miR-26b	0	0.439	0.7902
hsa-miR-20b	hsa-miR-16	0.034	0.42	0.79
hsa-miR-195	hsa-miR-146a	0.032	0.421	0.7898
hsa-miR-17-5p	hsa-miR-183	0.056	0.407	0.7886
hsa-miR-106b	hsa-miR-200a	0.036	0.418	0.7884
hsa-miR-200a	hsa-miR-320	0.036	0.418	0.7884
hsa-miR-142-5p	hsa-miR-30b	0	0.438	0.7884
hsa-miR-429	hsa-miR-183	0	0.438	0.7884
hsa-miR-141	hsa-let-7b	0.043	0.414	0.7882
hsa-miR-30b	hsa-miR-155	0.016	0.429	0.7882
hsa-miR-203	hsa-let-7b	0.05	0.41	0.788
hsa-miR-124	hsa-miR-1	0.041	0.415	0.788
hsa-miR-320	hsa-miR-200c	0.021	0.426	0.7878
hsa-let-7b	hsa-miR-16	0.052	0.408	0.7864
hsa-miR-138	hsa-miR-203	0.032	0.419	0.7862
hsa-miR-150	hsa-miR-182	0.044	0.412	0.7856
hsa-miR-17-5p	hsa-miR-148a	0.058	0.404	0.7852
hsa-miR-195	hsa-miR-145	0.058	0.404	0.7852
hsa-miR-195	hsa-miR-200c	0.058	0.404	0.7852
hsa-miR-20a	hsa-miR-29c	0.04	0.414	0.7852
hsa-miR-200a	hsa-miR-34a	0.074	0.395	0.785
hsa-miR-203	hsa-miR-19b	0.029	0.42	0.785
hsa-miR-203	hsa-miR-15b	0.012	0.429	0.7842
hsa-miR-26b	hsa-miR-141	0.037	0.415	0.784
hsa-miR-25	hsa-miR-146a	0.037	0.415	0.784
hsa-miR-30c	hsa-miR-222	0.044	0.411	0.7838
hsa-miR-30	hsa-miR-125b	0.035	0.416	0.7838
hsa-miR-143	hsa-miR-101	0.026	0.421	0.7838
hsa-miR-9	hsa-miR-34a	0.051	0.407	0.7836
hsa-miR-182	hsa-miR-16	0.049	0.408	0.7834
hsa-miR-17-5p	hsa-miR-15a	0.038	0.414	0.7832
hsa-miR-205	hsa-let-7a	0.063	0.4	0.783
hsa-miR-17-5p	hsa-miR-9	0.034	0.416	0.7828
hsa-miR-26b	hsa-miR-203	0.03	0.418	0.7824
hsa-miR-24	hsa-miR-15a	0.022	0.422	0.7816
hsa-miR-27a	hsa-miR-27b	0.569	0.118	0.7814
hsa-miR-93	hsa-miR-20b	0.279	0.279	0.7812
hsa-miR-192	hsa-miR-152	0.045	0.409	0.7812
hsa-miR-101	hsa-miR-222	0.025	0.42	0.781
hsa-miR-22	hsa-miR-15b	0.012	0.427	0.7806
hsa-miR-192	hsa-miR-106b	0.06	0.4	0.78
hsa-miR-142-3p	hsa-miR-200a	0.06	0.4	0.78
hsa-miR-205	hsa-miR-1	0.033	0.415	0.78
hsa-miR-30	hsa-miR-206	0.056	0.402	0.7796
hsa-miR-135a	hsa-miR-200c	0.066	0.396	0.7788
hsa-miR-192	hsa-miR-214	0.015	0.424	0.7782
hsa-miR-148a	hsa-miR-26a	0.031	0.415	0.778
hsa-miR-320	hsa-miR-141	0.052	0.403	0.7774
hsa-miR-26b	hsa-miR-200b	0.01	0.426	0.7768
hsa-miR-107	hsa-miR-19b	0.042	0.408	0.7764
hsa-miR-142-5p	hsa-miR-142-3p	0.02	0.42	0.776
hsa-miR-16-1	hsa-miR-10a	0.02	0.42	0.776
hsa-miR-30	hsa-miR-200c	0.027	0.416	0.7758
hsa-miR-218	hsa-miR-150	0.018	0.421	0.7758
hsa-miR-20b	hsa-miR-150	0	0.431	0.7758
hsa-miR-142-5p	hsa-miR-205	0.014	0.423	0.7754
hsa-miR-195	hsa-miR-141	0.067	0.393	0.7744
hsa-miR-132	hsa-let-7b	0.019	0.419	0.7732
hsa-miR-7	hsa-miR-20a	0.053	0.4	0.773
hsa-miR-203	hsa-miR-195	0.053	0.4	0.773
hsa-miR-29b	hsa-miR-15a	0.051	0.401	0.7728
hsa-let-7c	hsa-miR-21	0.024	0.416	0.7728
hsa-miR-142-5p	hsa-miR-16	0.011	0.423	0.7724
hsa-miR-152	hsa-miR-143	0	0.429	0.7722
hsa-miR-223	hsa-miR-30d	0	0.429	0.7722
hsa-miR-15a	hsa-miR-124	0.023	0.416	0.7718
hsa-miR-182	hsa-miR-200c	0.04	0.406	0.7708
hsa-miR-373	hsa-miR-200b	0.04	0.406	0.7708
hsa-miR-132	hsa-miR-23b	0.045	0.403	0.7704
hsa-miR-181a	hsa-miR-125b	0.043	0.404	0.7702
hsa-miR-373	hsa-miR-221	0.034	0.409	0.7702
hsa-miR-320	hsa-let-7a	0.077	0.385	0.77
hsa-miR-142-3p	hsa-miR-24	0.057	0.396	0.7698
hsa-miR-26a	hsa-miR-141	0.071	0.388	0.7694
hsa-miR-122	hsa-miR-155	0.063	0.392	0.7686
hsa-miR-23a	hsa-miR-20a	0.055	0.396	0.7678
hsa-miR-20a	hsa-miR-195	0.062	0.392	0.7676
hsa-miR-137	hsa-miR-141	0.035	0.407	0.7676
hsa-miR-143	hsa-miR-30c	0.035	0.407	0.7676
hsa-miR-29b	hsa-miR-34a	0.026	0.412	0.7676
hsa-miR-181b	hsa-miR-96	0.042	0.403	0.7674
hsa-miR-22	hsa-let-7b	0.04	0.404	0.7672
hsa-miR-16-1	hsa-miR-29b	0.038	0.405	0.767
hsa-miR-30c	hsa-miR-145	0.029	0.41	0.767
hsa-miR-429	hsa-miR-203	0	0.426	0.7668
hsa-miR-16-1	hsa-miR-26b	0.034	0.407	0.7666
hsa-miR-205	hsa-miR-141	0.21	0.309	0.7662
hsa-miR-138	hsa-miR-223	0.03	0.409	0.7662
hsa-miR-192	hsa-miR-135a	0.019	0.415	0.766
hsa-miR-214	hsa-miR-9	0.019	0.415	0.766
hsa-miR-25	hsa-miR-206	0.033	0.407	0.7656
hsa-miR-7	hsa-miR-200a	0.022	0.413	0.7654
hsa-let-7f	hsa-let-7a	0.362	0.224	0.7652
hsa-miR-101	hsa-miR-206	0.011	0.419	0.7652
hsa-miR-183	hsa-miR-16	0.034	0.406	0.7648
hsa-miR-126	hsa-miR-101	0.059	0.392	0.7646
hsa-miR-122	hsa-miR-141	0.039	0.403	0.7644
hsa-miR-23b	hsa-miR-143	0.039	0.403	0.7644
hsa-miR-125b	hsa-miR-124	0.028	0.409	0.7642
hsa-miR-7	hsa-miR-182	0.089	0.375	0.764
hsa-miR-17-5p	hsa-miR-15b	0.026	0.41	0.764
hsa-miR-30d	hsa-miR-155	0.011	0.418	0.7634
hsa-miR-137	hsa-miR-143	0.012	0.417	0.7626
hsa-miR-200a	hsa-miR-19a	0.028	0.408	0.7624
hsa-miR-135a	hsa-miR-203	0.031	0.406	0.7618
hsa-miR-146a	hsa-miR-29a	0.031	0.406	0.7618
hsa-miR-98	hsa-let-7c	0.328	0.241	0.7618
hsa-miR-10a	hsa-miR-200b	0.022	0.411	0.7618
hsa-miR-20b	hsa-miR-30	0.013	0.416	0.7618
hsa-miR-132	hsa-miR-30b	0.063	0.388	0.7614
hsa-miR-126	hsa-miR-107	0.054	0.393	0.7614
hsa-miR-20a	hsa-miR-29a	0.03	0.406	0.7608
hsa-miR-17-5p	hsa-miR-29b	0.037	0.402	0.7606
hsa-miR-26b	hsa-miR-320	0.082	0.377	0.7606
hsa-miR-214	hsa-miR-182	0.049	0.395	0.76
hsa-miR-372	hsa-miR-155	0.031	0.405	0.76
hsa-miR-107	hsa-miR-203	0.029	0.406	0.7598
hsa-miR-125b	hsa-let-7b	0.07	0.383	0.7594
hsa-miR-30	hsa-miR-221	0.061	0.388	0.7594
hsa-miR-320	hsa-miR-125b	0.043	0.398	0.7594
hsa-miR-429	hsa-miR-10a	0.023	0.409	0.7592
hsa-miR-10a	hsa-miR-143	0.044	0.397	0.7586
hsa-miR-107	hsa-miR-221	0.047	0.395	0.758
hsa-miR-101	hsa-miR-145	0.054	0.391	0.7578
hsa-miR-106b	hsa-miR-15a	0.045	0.396	0.7578
hsa-miR-96	hsa-miR-206	0.041	0.398	0.7574
hsa-miR-214	hsa-miR-150	0.056	0.389	0.7562
hsa-miR-223	hsa-miR-23a	0.027	0.405	0.756
hsa-let-7c	hsa-let-7b	0.322	0.241	0.7558
hsa-miR-22	hsa-miR-19b	0.03	0.403	0.7554
hsa-miR-20b	hsa-miR-34a	0.035	0.4	0.755
hsa-miR-29c	hsa-miR-206	0.049	0.392	0.7546
hsa-miR-122	hsa-miR-135a	0.016	0.41	0.754
hsa-miR-205	hsa-miR-15a	0.075	0.377	0.7536
hsa-miR-17-5p	hsa-miR-29c	0.028	0.403	0.7534
hsa-miR-182	hsa-miR-205	0.1	0.363	0.7534
hsa-miR-192	hsa-miR-125b	0.073	0.378	0.7534
hsa-miR-218	hsa-miR-181b	0.033	0.4	0.753
hsa-miR-223	hsa-miR-30c	0.038	0.397	0.7526
hsa-miR-200a	hsa-miR-24	0	0.418	0.7524
hsa-miR-142-5p	hsa-miR-30c	0	0.418	0.7524
hsa-miR-181c	hsa-miR-181a	0.421	0.184	0.7522
hsa-miR-96	hsa-let-7a	0.057	0.386	0.7518
hsa-miR-203	hsa-miR-96	0.057	0.386	0.7518
hsa-miR-103	hsa-miR-107	0.478	0.152	0.7516
hsa-miR-150	hsa-miR-16	0.064	0.382	0.7516
hsa-miR-135a	hsa-miR-125b	0.01	0.412	0.7516
hsa-miR-372	hsa-miR-20b	0.188	0.313	0.7514
hsa-miR-98	hsa-miR-221	0.062	0.383	0.7514
hsa-miR-106b	hsa-miR-205	0.026	0.403	0.7514
hsa-miR-26a	hsa-miR-1	0.017	0.408	0.7514
hsa-miR-23b	hsa-miR-155	0.042	0.394	0.7512
hsa-miR-152	hsa-miR-206	0.049	0.39	0.751
hsa-miR-29a	hsa-miR-155	0.04	0.395	0.751
hsa-miR-101	hsa-miR-21	0.053	0.387	0.7496
hsa-miR-132	hsa-miR-124	0.02	0.405	0.749
hsa-miR-22	hsa-miR-183	0.053	0.386	0.7478
hsa-miR-30	hsa-miR-141	0.02	0.404	0.7472
hsa-miR-32	hsa-miR-206	0.011	0.409	0.7472
hsa-miR-32	hsa-miR-141	0	0.415	0.747
hsa-miR-320	hsa-miR-26a	0.043	0.391	0.7468
hsa-miR-96	hsa-miR-155	0.041	0.392	0.7466
hsa-miR-17-5p	hsa-miR-205	0.041	0.392	0.7466
hsa-miR-214	hsa-miR-15a	0.041	0.392	0.7466
hsa-miR-192	hsa-miR-320	0.019	0.404	0.7462
hsa-miR-27a	hsa-miR-21	0.044	0.39	0.746
hsa-miR-320	hsa-miR-20a	0.047	0.388	0.7454
hsa-miR-142-5p	hsa-miR-30d	0.014	0.406	0.7448
hsa-miR-373	hsa-miR-21	0.051	0.385	0.744
hsa-miR-135a	hsa-miR-223	0.045	0.388	0.7434
hsa-miR-122	hsa-miR-183	0.036	0.393	0.7434
hsa-miR-152	hsa-miR-126	0	0.413	0.7434
hsa-miR-128a	hsa-miR-222	0	0.413	0.7434
hsa-miR-10a	hsa-miR-206	0.048	0.386	0.7428
hsa-miR-137	hsa-miR-200c	0.03	0.396	0.7428
hsa-miR-135a	hsa-miR-200a	0.055	0.382	0.7426
hsa-miR-142-5p	hsa-miR-218	0	0.412	0.7416
hsa-miR-142-5p	hsa-let-7c	0	0.412	0.7416
hsa-miR-198	hsa-miR-9	0.034	0.393	0.7414
hsa-miR-372	hsa-miR-200b	0.032	0.394	0.7412
hsa-miR-192	hsa-miR-205	0.077	0.369	0.7412
hsa-miR-218	hsa-miR-20a	0.012	0.405	0.741
hsa-miR-24	hsa-miR-15b	0.053	0.382	0.7406
hsa-miR-26a	hsa-miR-16	0.026	0.397	0.7406
hsa-miR-126	hsa-miR-26a	0.033	0.393	0.7404
hsa-miR-22	hsa-miR-320	0.033	0.393	0.7404
hsa-miR-148a	hsa-miR-107	0.033	0.393	0.7404
hsa-miR-107	hsa-miR-223	0.056	0.38	0.74
hsa-miR-17-5p	hsa-miR-24	0.074	0.37	0.74
hsa-miR-152	hsa-miR-148a	0.351	0.216	0.7398
hsa-miR-23b	hsa-miR-9	0.066	0.374	0.7392
hsa-miR-30b	hsa-miR-200c	0.046	0.385	0.739
hsa-miR-192	hsa-miR-9	0.037	0.39	0.739
hsa-miR-24	hsa-miR-29b	0.037	0.39	0.739
hsa-miR-32	hsa-miR-21	0.026	0.396	0.7388
hsa-miR-107	hsa-let-7a	0.047	0.384	0.7382
hsa-miR-34a	hsa-miR-1	0.036	0.39	0.738
hsa-miR-20b	hsa-miR-198	0.018	0.4	0.738
hsa-miR-135b	hsa-miR-132	0	0.41	0.738
hsa-miR-30	hsa-miR-1	0.043	0.386	0.7378
hsa-miR-198	hsa-miR-34a	0.034	0.391	0.7378
hsa-miR-9	hsa-miR-124	0.023	0.397	0.7376
hsa-miR-183	hsa-miR-214	0.028	0.394	0.7372
hsa-miR-20b	hsa-miR-15b	0.026	0.395	0.737
hsa-miR-218	hsa-miR-143	0.058	0.377	0.7366
hsa-miR-143	hsa-miR-19a	0.022	0.396	0.7348
hsa-miR-122	hsa-miR-1	0.036	0.388	0.7344
hsa-miR-142-5p	hsa-miR-10a	0	0.408	0.7344
hsa-miR-126	hsa-miR-124	0.007	0.404	0.7342
hsa-miR-22	hsa-miR-29b	0.048	0.381	0.7338
hsa-miR-138	hsa-let-7a	0.064	0.372	0.7336
hsa-miR-122	hsa-miR-9	0.033	0.389	0.7332
hsa-miR-132	hsa-miR-29c	0.013	0.4	0.733
hsa-miR-96	hsa-miR-221	0.045	0.382	0.7326
hsa-miR-122	hsa-miR-205	0.099	0.352	0.7326
hsa-miR-142-5p	hsa-miR-122	0	0.407	0.7326
hsa-miR-152	hsa-miR-181b	0	0.407	0.7326
hsa-miR-192	hsa-miR-181a	0.019	0.396	0.7318
hsa-miR-148a	hsa-miR-183	0.019	0.396	0.7318
hsa-miR-29a	hsa-miR-206	0.049	0.379	0.7312
hsa-miR-98	hsa-miR-223	0.076	0.364	0.7312
hsa-miR-132	hsa-miR-195	0.025	0.392	0.7306
hsa-miR-135a	hsa-miR-22	0.016	0.397	0.7306
hsa-miR-223	hsa-miR-182	0.147	0.324	0.7302
hsa-miR-320	hsa-miR-223	0.015	0.397	0.7296
hsa-miR-107	hsa-miR-181a	0.015	0.397	0.7296
hsa-miR-30b	hsa-miR-16	0.031	0.388	0.7294
hsa-miR-137	hsa-miR-206	0.02	0.394	0.7292
hsa-miR-30c	hsa-miR-20a	0.02	0.394	0.7292
hsa-miR-106b	hsa-miR-200c	0.032	0.387	0.7286
hsa-miR-106b	hsa-miR-223	0.03	0.388	0.7284
hsa-miR-183	hsa-let-7a	0.066	0.368	0.7284
hsa-miR-122	hsa-miR-125b	0.055	0.374	0.7282
hsa-miR-198	hsa-miR-141	0.026	0.39	0.728
hsa-miR-182	hsa-miR-26a	0.08	0.36	0.728
hsa-miR-122	hsa-miR-203	0.049	0.377	0.7276
hsa-miR-320	hsa-miR-221	0.037	0.383	0.7264
hsa-miR-183	hsa-miR-34a	0.035	0.384	0.7262
hsa-miR-214	hsa-miR-26a	0.089	0.354	0.7262
hsa-miR-198	hsa-miR-200c	0.022	0.391	0.7258
hsa-miR-29c	hsa-miR-125b	0.047	0.377	0.7256
hsa-miR-122	hsa-miR-20b	0.018	0.393	0.7254
hsa-miR-27b	hsa-miR-21	0.025	0.389	0.7252
hsa-miR-23b	hsa-miR-23a	0.5	0.125	0.725
hsa-miR-20a	hsa-miR-30d	0.03	0.386	0.7248
hsa-miR-25	hsa-miR-21	0.053	0.373	0.7244
hsa-miR-30c	hsa-miR-155	0.017	0.393	0.7244
hsa-miR-25	hsa-miR-200b	0.042	0.379	0.7242
hsa-miR-429	hsa-miR-135a	0.04	0.38	0.724
hsa-miR-101	hsa-miR-200b	0.031	0.385	0.724
hsa-miR-148a	hsa-miR-15b	0.013	0.395	0.724
hsa-miR-10a	hsa-miR-21	0.056	0.371	0.7238
hsa-miR-192	hsa-miR-15a	0.065	0.366	0.7238
hsa-miR-320	hsa-miR-148a	0.036	0.382	0.7236
hsa-miR-214	hsa-miR-181a	0.027	0.387	0.7236
hsa-miR-132	hsa-miR-29a	0.012	0.395	0.723
hsa-miR-148a	hsa-miR-150	0.056	0.37	0.722
hsa-miR-106b	hsa-miR-30	0.038	0.38	0.722
hsa-miR-20a	hsa-miR-30b	0.029	0.385	0.722
hsa-miR-19b	hsa-miR-145	0.02	0.39	0.722
hsa-miR-26a	hsa-miR-205	0.099	0.346	0.7218
hsa-miR-7	hsa-miR-150	0.061	0.367	0.7216
hsa-miR-205	hsa-miR-16	0.052	0.372	0.7216
hsa-miR-223	hsa-miR-23b	0.043	0.377	0.7216
hsa-miR-372	hsa-miR-206	0.034	0.382	0.7216
hsa-miR-200a	hsa-miR-1	0.025	0.387	0.7216
hsa-miR-148a	hsa-miR-1	0.025	0.387	0.7216
hsa-miR-200a	hsa-let-7b	0.032	0.383	0.7214
hsa-miR-107	hsa-miR-145	0.03	0.384	0.7212
hsa-miR-126	hsa-miR-10a	0.093	0.349	0.7212
hsa-let-7d	hsa-miR-98	0.4	0.178	0.7204
hsa-miR-29a	hsa-miR-125b	0.047	0.374	0.7202
hsa-miR-126	hsa-miR-27b	0.088	0.351	0.7198
hsa-miR-133a	hsa-miR-206	0.066	0.363	0.7194
hsa-let-7c	hsa-miR-221	0.066	0.363	0.7194
hsa-miR-106b	hsa-miR-29b	0.048	0.373	0.7194
hsa-miR-198	hsa-miR-16	0.028	0.384	0.7192
hsa-miR-142-5p	hsa-miR-150	0.019	0.389	0.7192
hsa-miR-20b	hsa-miR-183	0.019	0.389	0.7192
hsa-miR-218	hsa-miR-155	0.019	0.389	0.7192
hsa-miR-150	hsa-miR-1	0.042	0.376	0.7188
hsa-miR-135a	hsa-let-7a	0.024	0.386	0.7188
hsa-miR-223	hsa-miR-19a	0.024	0.386	0.7188
hsa-miR-106b	hsa-miR-125b	0.078	0.356	0.7188
hsa-let-7b	hsa-miR-15a	0.029	0.383	0.7184
hsa-miR-192	hsa-miR-93	0.02	0.388	0.7184
hsa-miR-203	hsa-miR-29b	0.011	0.393	0.7184
hsa-miR-26b	hsa-miR-181b	0.014	0.391	0.7178
hsa-let-7c	hsa-miR-9	0.059	0.366	0.7178
hsa-miR-132	hsa-let-7c	0.039	0.377	0.7176
hsa-miR-128a	hsa-miR-143	0.042	0.375	0.717
hsa-miR-142-3p	hsa-miR-16	0.04	0.376	0.7168
hsa-miR-24	hsa-let-7a	0.108	0.338	0.7164
hsa-miR-34a	hsa-miR-15a	0.043	0.374	0.7162
hsa-miR-135a	hsa-miR-20a	0.034	0.379	0.7162
hsa-miR-32	hsa-miR-20a	0.034	0.379	0.7162
hsa-miR-19b	hsa-miR-1	0.023	0.385	0.716
hsa-miR-218	hsa-miR-223	0.066	0.361	0.7158
hsa-miR-142-5p	hsa-miR-148a	0.064	0.362	0.7156
hsa-miR-320	hsa-miR-24	0.053	0.368	0.7154
hsa-miR-133a	hsa-miR-21	0.013	0.39	0.715
hsa-miR-142-5p	hsa-miR-23b	0	0.397	0.7146
hsa-miR-138	hsa-miR-155	0.043	0.373	0.7144
hsa-miR-122	hsa-miR-22	0.17	0.302	0.7136
hsa-miR-10a	hsa-let-7a	0.026	0.382	0.7136
hsa-miR-223	hsa-miR-27a	0.026	0.382	0.7136
hsa-miR-96	hsa-miR-200c	0.071	0.357	0.7136
hsa-miR-30c	hsa-miR-200c	0.049	0.369	0.7132
hsa-miR-23a	hsa-miR-145	0.04	0.374	0.7132
hsa-miR-372	hsa-miR-146a	0.038	0.375	0.713
hsa-miR-32	hsa-miR-222	0.038	0.375	0.713
hsa-miR-26b	hsa-miR-183	0.016	0.387	0.7126
hsa-miR-192	hsa-let-7b	0.057	0.364	0.7122
hsa-miR-192	hsa-miR-30	0.028	0.38	0.712
hsa-miR-429	hsa-let-7a	0.028	0.38	0.712
hsa-miR-7	hsa-miR-200b	0.035	0.376	0.7118
hsa-miR-22	hsa-miR-30	0.051	0.367	0.7116
hsa-miR-135b	hsa-miR-222	0	0.395	0.711
hsa-miR-128a	hsa-miR-200b	0.021	0.383	0.7104
hsa-miR-30d	hsa-miR-200c	0.037	0.374	0.7102
hsa-miR-320	hsa-miR-155	0.037	0.374	0.7102
hsa-miR-214	hsa-miR-125b	0.047	0.368	0.7094
hsa-miR-26b	hsa-miR-125b	0.052	0.365	0.709
hsa-miR-23a	hsa-miR-9	0.052	0.365	0.709
hsa-miR-29c	hsa-miR-34a	0.05	0.366	0.7088
hsa-miR-7	hsa-miR-22	0.06	0.36	0.708
hsa-miR-218	hsa-miR-200a	0.06	0.36	0.708
hsa-miR-372	hsa-miR-221	0.092	0.342	0.7076
hsa-miR-133a	hsa-miR-143	0.038	0.372	0.7076
hsa-miR-107	hsa-miR-15a	0.09	0.343	0.7074
hsa-miR-143	hsa-miR-27a	0.036	0.373	0.7074
hsa-miR-205	hsa-miR-125b	0.027	0.378	0.7074
hsa-miR-122	hsa-miR-148a	0	0.393	0.7074
hsa-miR-106b	hsa-miR-19b	0.097	0.339	0.7072
hsa-miR-183	hsa-miR-15a	0.03	0.376	0.7068
hsa-miR-32	hsa-miR-200b	0.021	0.381	0.7068
hsa-miR-10a	hsa-miR-132	0.017	0.383	0.7064
hsa-miR-29a	hsa-miR-9	0.038	0.371	0.7058
hsa-miR-16-1	hsa-miR-138	0.018	0.382	0.7056
hsa-miR-135a	hsa-miR-17-5p	0.034	0.373	0.7054
hsa-miR-223	hsa-miR-205	0.089	0.342	0.7046
hsa-miR-30b	hsa-miR-141	0.053	0.362	0.7046
hsa-miR-150	hsa-miR-96	0.06	0.358	0.7044
hsa-miR-137	hsa-miR-221	0.011	0.385	0.704
hsa-miR-17-5p	hsa-miR-19a	0.07	0.352	0.7036
hsa-miR-26a	hsa-miR-125b	0.039	0.369	0.7032
hsa-miR-26a	hsa-miR-29b	0.021	0.379	0.7032
hsa-miR-148a	hsa-miR-205	0.028	0.375	0.703
hsa-miR-7	hsa-miR-192	0.103	0.333	0.7024
hsa-miR-200a	hsa-miR-15a	0.038	0.369	0.7022
hsa-miR-122	hsa-miR-200a	0.057	0.358	0.7014
hsa-miR-429	hsa-miR-132	0.057	0.358	0.7014
hsa-miR-19a	hsa-miR-200c	0.057	0.358	0.7014
hsa-miR-126	hsa-miR-19a	0.03	0.373	0.7014
hsa-miR-106b	hsa-miR-34a	0.045	0.364	0.7002
hsa-miR-93	hsa-miR-16-1	0	0.389	0.7002
hsa-miR-20b	hsa-miR-29c	0	0.389	0.7002
hsa-miR-429	hsa-miR-150	0.063	0.354	0.7002
hsa-miR-16-1	hsa-miR-182	0.1	0.333	0.6994
hsa-miR-17-5p	hsa-miR-96	0.062	0.354	0.6992
hsa-miR-17-5p	hsa-miR-138	0.017	0.379	0.6992
hsa-miR-135a	hsa-miR-141	0.038	0.367	0.6986
hsa-miR-142-3p	hsa-miR-9	0.011	0.382	0.6986
hsa-miR-182	hsa-miR-141	0.011	0.382	0.6986
hsa-miR-200a	hsa-miR-15b	0.027	0.373	0.6984
hsa-miR-19a	hsa-miR-125b	0.027	0.373	0.6984
hsa-miR-29c	hsa-miR-141	0.044	0.363	0.6974
hsa-miR-122	hsa-miR-19b	0.015	0.379	0.6972
hsa-miR-122	hsa-miR-17-5p	0.054	0.357	0.6966
hsa-miR-142-3p	hsa-miR-25	0.054	0.357	0.6966
hsa-miR-142-3p	hsa-miR-181a	0.054	0.357	0.6966
hsa-miR-142-5p	hsa-miR-23a	0	0.387	0.6966
hsa-miR-23a	hsa-miR-200c	0.03	0.37	0.696
hsa-miR-22	hsa-miR-214	0.055	0.356	0.6958
hsa-miR-135a	hsa-miR-155	0.037	0.366	0.6958
hsa-miR-214	hsa-miR-96	0.024	0.373	0.6954
hsa-miR-30c	hsa-miR-30d	0.459	0.131	0.6948
hsa-miR-16-1	hsa-miR-320	0	0.386	0.6948
hsa-miR-192	hsa-miR-218	0.043	0.362	0.6946
hsa-miR-17-5p	hsa-miR-30	0.039	0.364	0.6942
hsa-miR-214	hsa-miR-205	0.033	0.367	0.6936
hsa-miR-98	hsa-miR-203	0.047	0.359	0.6932
hsa-miR-142-5p	hsa-miR-98	0.018	0.375	0.693
hsa-miR-17-5p	hsa-miR-34a	0.071	0.345	0.692
hsa-miR-192	hsa-miR-195	0.081	0.339	0.6912
hsa-miR-192	hsa-miR-15b	0	0.384	0.6912
hsa-miR-150	hsa-miR-200c	0.032	0.366	0.6908
hsa-let-7i	hsa-let-7a	0.356	0.186	0.6908
hsa-miR-25	hsa-miR-221	0.09	0.333	0.6894
hsa-miR-19a	hsa-miR-145	0.018	0.373	0.6894
hsa-miR-181b	hsa-miR-29b	0.034	0.364	0.6892
hsa-miR-429	hsa-miR-214	0.032	0.365	0.689
hsa-miR-320	hsa-miR-203	0.032	0.365	0.689
hsa-miR-137	hsa-miR-145	0.03	0.366	0.6888
hsa-miR-22	hsa-miR-30d	0.026	0.368	0.6884
hsa-miR-130a	hsa-miR-21	0.026	0.368	0.6884
hsa-miR-223	hsa-miR-27b	0.04	0.36	0.688
hsa-miR-205	hsa-miR-29b	0.04	0.36	0.688
hsa-miR-142-5p	hsa-miR-106b	0	0.382	0.6876
hsa-miR-30b	hsa-miR-9	0.037	0.361	0.6868
hsa-let-7i	hsa-miR-98	0.429	0.143	0.6864
hsa-miR-30c	hsa-miR-221	0.067	0.344	0.6862
hsa-miR-429	hsa-miR-125b	0.036	0.361	0.6858
hsa-miR-106b	hsa-miR-1	0.036	0.361	0.6858
hsa-let-7i	hsa-let-7g	0.576	0.061	0.6858
hsa-miR-26a	hsa-miR-181a	0.043	0.357	0.6856
hsa-miR-126	hsa-miR-373	0.034	0.362	0.6856
hsa-miR-22	hsa-miR-124	0.007	0.377	0.6856
hsa-miR-24	hsa-miR-124	0.014	0.373	0.6854
hsa-miR-198	hsa-miR-1	0.03	0.364	0.6852
hsa-miR-132	hsa-miR-32	0.03	0.364	0.6852
hsa-let-7d	hsa-let-7a	0.361	0.18	0.685
hsa-miR-26b	hsa-let-7a	0.1	0.325	0.685
hsa-miR-122	hsa-miR-16	0.028	0.365	0.685
hsa-miR-203	hsa-miR-137	0.058	0.348	0.6844
hsa-miR-142-3p	hsa-miR-200c	0.011	0.374	0.6842
hsa-miR-183	hsa-miR-205	0.027	0.365	0.684
hsa-miR-93	hsa-miR-126	0	0.38	0.684
hsa-miR-126	hsa-miR-29b	0.068	0.342	0.6836
hsa-miR-16-1	hsa-miR-107	0.033	0.361	0.6828
hsa-miR-16-1	hsa-let-7b	0.043	0.355	0.682
hsa-miR-30	hsa-miR-15a	0.039	0.357	0.6816
hsa-miR-29c	hsa-miR-145	0.058	0.346	0.6808
hsa-miR-135a	hsa-miR-9	0.022	0.366	0.6808
hsa-miR-223	hsa-miR-124	0.02	0.367	0.6806
hsa-miR-16-1	hsa-miR-25	0.018	0.368	0.6804
hsa-miR-138	hsa-miR-183	0.018	0.368	0.6804
hsa-miR-24	hsa-miR-29c	0.014	0.37	0.68
hsa-miR-200a	hsa-miR-182	0.015	0.369	0.6792
hsa-miR-203	hsa-miR-181a	0.015	0.369	0.6792
hsa-miR-106b	hsa-let-7a	0.063	0.342	0.6786
hsa-miR-218	hsa-miR-200c	0.045	0.352	0.6786
hsa-miR-152	hsa-miR-221	0	0.377	0.6786
hsa-miR-107	hsa-miR-15b	0.158	0.289	0.6782
hsa-miR-22	hsa-miR-19a	0.039	0.355	0.678
hsa-miR-152	hsa-miR-20a	0.012	0.37	0.678
hsa-miR-150	hsa-miR-205	0.053	0.347	0.6776
hsa-miR-26b	hsa-miR-150	0.031	0.359	0.6772
hsa-miR-130b	hsa-miR-20a	0.048	0.349	0.6762
hsa-miR-198	hsa-miR-20a	0.048	0.349	0.6762
hsa-miR-17-5p	hsa-miR-107	0.048	0.349	0.6762
hsa-miR-320	hsa-miR-181b	0.048	0.349	0.6762
hsa-miR-24	hsa-miR-19b	0.048	0.349	0.6762
hsa-miR-30d	hsa-miR-16	0.021	0.364	0.6762
hsa-miR-98	hsa-miR-200b	0.064	0.34	0.676
hsa-miR-16-1	hsa-miR-218	0.019	0.365	0.676
hsa-miR-141	hsa-miR-124	0.006	0.372	0.6756
hsa-miR-101	hsa-miR-20a	0.047	0.349	0.6752
hsa-miR-132	hsa-miR-30d	0.038	0.354	0.6752
hsa-miR-181b	hsa-let-7b	0.029	0.359	0.6752
hsa-miR-182	hsa-miR-34a	0.02	0.364	0.6752
hsa-let-7a	hsa-miR-29c	0.043	0.351	0.6748
hsa-miR-182	hsa-miR-125b	0.05	0.347	0.6746
hsa-miR-25	hsa-miR-19b	0.03	0.358	0.6744
hsa-miR-203	hsa-miR-30	0.037	0.354	0.6742
hsa-miR-181a	hsa-let-7a	0.037	0.354	0.6742
hsa-miR-29c	hsa-miR-1	0.028	0.359	0.6742
hsa-miR-181a	hsa-miR-34a	0.033	0.356	0.6738
hsa-miR-142-5p	hsa-miR-29b	0.013	0.367	0.6736
hsa-miR-17-5p	hsa-let-7a	0.065	0.338	0.6734
hsa-miR-23a	hsa-miR-16	0.038	0.353	0.6734
hsa-miR-142-5p	hsa-miR-135a	0.018	0.364	0.6732
hsa-miR-142-5p	hsa-miR-96	0.016	0.365	0.673
hsa-miR-218	hsa-miR-141	0.041	0.351	0.6728
hsa-miR-27a	hsa-miR-155	0.041	0.351	0.6728
hsa-miR-205	hsa-miR-181a	0.026	0.359	0.6722
hsa-let-7f	hsa-let-7i	0.472	0.111	0.6718
hsa-miR-372	hsa-miR-200c	0.092	0.322	0.6716
hsa-miR-195	hsa-miR-221	0.065	0.337	0.6716
hsa-miR-150	hsa-miR-26a	0.029	0.357	0.6716
hsa-miR-181b	hsa-miR-19b	0.029	0.357	0.6716
hsa-miR-27a	hsa-miR-15b	0.011	0.367	0.6716
hsa-miR-25	hsa-let-7a	0.063	0.338	0.6714
hsa-miR-429	hsa-miR-320	0	0.373	0.6714
hsa-miR-181b	hsa-miR-124	0.007	0.369	0.6712
hsa-miR-135a	hsa-miR-181a	0.032	0.355	0.671
hsa-miR-198	hsa-miR-181b	0.032	0.355	0.671
hsa-miR-30d	hsa-miR-141	0.032	0.355	0.671
hsa-let-7d	hsa-miR-146a	0.012	0.366	0.6708
hsa-miR-23b	hsa-miR-145	0.01	0.367	0.6706
hsa-miR-192	hsa-miR-19a	0.062	0.338	0.6704
hsa-miR-106b	hsa-miR-23a	0.062	0.338	0.6704
hsa-miR-198	hsa-miR-223	0.015	0.364	0.6702
hsa-miR-152	hsa-miR-200b	0.022	0.36	0.67
hsa-miR-106b	hsa-miR-9	0.011	0.366	0.6698
hsa-miR-30b	hsa-miR-1	0.027	0.357	0.6696
hsa-miR-142-3p	hsa-miR-203	0.07	0.333	0.6694
hsa-miR-20b	hsa-miR-29b	0.025	0.358	0.6694
hsa-miR-200a	hsa-miR-16	0.041	0.349	0.6692
hsa-miR-192	hsa-miR-19b	0.017	0.362	0.6686
hsa-let-7c	hsa-miR-155	0.04	0.349	0.6682
hsa-miR-20b	hsa-miR-182	0.031	0.354	0.6682
hsa-miR-22	hsa-miR-26b	0.031	0.354	0.6682
hsa-miR-19b	hsa-miR-26a	0.013	0.364	0.6682
hsa-miR-10a	hsa-miR-200a	0.02	0.36	0.668
hsa-miR-24	hsa-miR-29a	0.027	0.356	0.6678
hsa-miR-200a	hsa-miR-98	0.035	0.351	0.6668
hsa-miR-181c	hsa-miR-181b	0.267	0.222	0.6666
hsa-let-7a	hsa-miR-29a	0.042	0.347	0.6666
hsa-miR-26b	hsa-miR-16	0.033	0.352	0.6666
hsa-miR-372	hsa-miR-203	0.067	0.333	0.6664
hsa-miR-135a	hsa-miR-26b	0.047	0.344	0.6662
hsa-miR-142-5p	hsa-miR-1	0	0.37	0.666
hsa-let-7b	hsa-miR-124	0.016	0.361	0.6658
hsa-miR-126	hsa-miR-128a	0.041	0.347	0.6656
hsa-miR-19b	hsa-miR-9	0.01	0.364	0.6652
hsa-miR-22	hsa-miR-29a	0.026	0.355	0.665
hsa-miR-181b	hsa-miR-30c	0.04	0.347	0.6646
hsa-miR-22	hsa-miR-23a	0.029	0.353	0.6644
hsa-miR-20b	hsa-miR-25	0.054	0.339	0.6642
hsa-miR-142-3p	hsa-miR-22	0.054	0.339	0.6642
hsa-miR-106b	hsa-miR-25	0.189	0.264	0.6642
hsa-miR-214	hsa-let-7b	0.027	0.354	0.6642
hsa-miR-107	hsa-miR-155	0.042	0.345	0.663
hsa-miR-181a	hsa-miR-1	0.024	0.355	0.663
hsa-miR-142-3p	hsa-miR-182	0.063	0.333	0.6624
hsa-miR-429	hsa-miR-19b	0	0.368	0.6624
hsa-miR-150	hsa-miR-125b	0.043	0.344	0.6622
hsa-miR-122	hsa-miR-15b	0.025	0.354	0.6622
hsa-miR-16-1	hsa-miR-124	0.007	0.364	0.6622
hsa-miR-203	hsa-miR-124	0.021	0.356	0.6618
hsa-miR-93	hsa-miR-195	0.028	0.352	0.6616
hsa-miR-26b	hsa-miR-1	0.017	0.358	0.6614
hsa-miR-93	hsa-miR-24	0.018	0.357	0.6606
hsa-miR-126	hsa-miR-30c	0.032	0.349	0.6602
hsa-miR-29a	hsa-miR-145	0.037	0.346	0.6598
hsa-miR-372	hsa-miR-22	0.069	0.328	0.6594
hsa-miR-192	hsa-miR-30d	0.015	0.358	0.6594
hsa-miR-372	hsa-miR-223	0.015	0.358	0.6594
hsa-miR-132	hsa-miR-27a	0.027	0.351	0.6588
hsa-miR-429	hsa-miR-205	0.259	0.222	0.6586
hsa-let-7f	hsa-let-7g	0.5	0.088	0.6584
hsa-miR-23b	hsa-miR-125b	0.064	0.33	0.658
hsa-miR-27b	hsa-miR-9	0.051	0.337	0.6576
hsa-miR-128a	hsa-miR-21	0.033	0.347	0.6576
hsa-miR-152	hsa-miR-21	0.02	0.354	0.6572
hsa-miR-10a	hsa-miR-22	0.036	0.345	0.657
hsa-miR-15b	hsa-miR-34a	0.009	0.36	0.657
hsa-miR-19b	hsa-miR-205	0	0.365	0.657
hsa-miR-192	hsa-miR-96	0.088	0.316	0.6568
hsa-miR-10a	hsa-miR-200c	0.023	0.352	0.6566
hsa-miR-93	hsa-miR-19b	0.066	0.328	0.6564
hsa-miR-27a	hsa-miR-125b	0.039	0.343	0.6564
hsa-miR-10a	hsa-miR-222	0.056	0.333	0.6554
hsa-miR-30d	hsa-miR-9	0.038	0.343	0.6554
hsa-miR-126	hsa-miR-30b	0.029	0.348	0.6554
hsa-miR-122	hsa-miR-135b	0	0.364	0.6552
hsa-miR-152	hsa-miR-146a	0	0.364	0.6552
hsa-miR-107	hsa-miR-141	0.048	0.337	0.6546
hsa-miR-122	hsa-miR-182	0.111	0.302	0.6546
hsa-miR-192	hsa-miR-29a	0.046	0.338	0.6544
hsa-miR-30d	hsa-miR-125b	0.037	0.343	0.6544
hsa-miR-138	hsa-miR-16	0.028	0.348	0.6544
hsa-miR-96	hsa-miR-141	0.047	0.337	0.6536
hsa-miR-198	hsa-let-7a	0.038	0.342	0.6536
hsa-miR-23b	hsa-miR-200c	0.021	0.351	0.6528
hsa-miR-132	hsa-miR-30c	0.053	0.333	0.6524
hsa-miR-429	hsa-miR-96	0.053	0.333	0.6524
hsa-miR-135a	hsa-miR-183	0.053	0.333	0.6524
hsa-let-7g	hsa-let-7a	0.368	0.158	0.6524
hsa-let-7d	hsa-miR-21	0.033	0.344	0.6522
hsa-miR-22	hsa-miR-150	0.033	0.344	0.6522
hsa-miR-7	hsa-miR-214	0.015	0.354	0.6522
hsa-miR-148a	hsa-miR-96	0.015	0.354	0.6522
hsa-miR-142-5p	hsa-miR-183	0.04	0.34	0.652
hsa-miR-133b	hsa-miR-133a	0.605	0.026	0.6518
hsa-miR-22	hsa-miR-29c	0.027	0.347	0.6516
hsa-miR-148a	hsa-miR-181a	0	0.362	0.6516
hsa-miR-135b	hsa-miR-126	0	0.362	0.6516
hsa-miR-372	hsa-miR-16	0.052	0.333	0.6514
hsa-miR-106b	hsa-miR-195	0.086	0.314	0.6512
hsa-miR-148a	hsa-miR-16	0.023	0.349	0.6512
hsa-miR-29c	hsa-miR-200c	0.028	0.346	0.6508
hsa-miR-223	hsa-let-7c	0.051	0.333	0.6504
hsa-miR-138	hsa-miR-132	0.031	0.344	0.6502
hsa-miR-203	hsa-miR-25	0.031	0.344	0.6502
hsa-miR-181b	hsa-miR-195	0.013	0.354	0.6502
hsa-miR-148a	hsa-miR-29b	0.065	0.325	0.65
hsa-miR-122	hsa-miR-10a	0.038	0.34	0.65
hsa-miR-16-1	hsa-miR-135a	0.018	0.351	0.6498
hsa-miR-148a	hsa-miR-19b	0.05	0.333	0.6494
hsa-miR-150	hsa-miR-181a	0.05	0.333	0.6494
hsa-miR-217	hsa-miR-222	0.057	0.329	0.6492
hsa-miR-98	hsa-miR-9	0.055	0.33	0.649
hsa-miR-30d	hsa-miR-30b	0.532	0.065	0.649
hsa-miR-24	hsa-miR-30	0.026	0.346	0.6488
hsa-miR-7	hsa-miR-16-1	0.022	0.348	0.6484
hsa-miR-142-3p	hsa-miR-34a	0.048	0.333	0.6474
hsa-miR-106b	hsa-miR-181b	0.048	0.333	0.6474
hsa-miR-372	hsa-miR-141	0.039	0.338	0.6474
hsa-miR-138	hsa-miR-141	0.039	0.338	0.6474
hsa-miR-137	hsa-miR-9	0.03	0.343	0.6474
hsa-miR-29c	hsa-miR-9	0.019	0.349	0.6472
hsa-miR-126	hsa-miR-137	0.017	0.35	0.647
hsa-miR-183	hsa-miR-125b	0.033	0.341	0.6468
hsa-let-7c	hsa-miR-141	0.033	0.341	0.6468
hsa-miR-182	hsa-miR-1	0.058	0.327	0.6466
hsa-miR-142-3p	hsa-miR-183	0.058	0.327	0.6466
hsa-miR-200a	hsa-miR-96	0.065	0.323	0.6464
hsa-miR-203	hsa-miR-101	0.065	0.323	0.6464
hsa-miR-16-1	hsa-miR-30d	0.029	0.343	0.6464
hsa-miR-217	hsa-miR-181b	0.036	0.339	0.6462
hsa-miR-200a	hsa-miR-25	0.036	0.339	0.6462
hsa-miR-29a	hsa-miR-200c	0.018	0.349	0.6462
hsa-miR-96	hsa-miR-16	0.055	0.328	0.6454
hsa-miR-133a	hsa-miR-222	0.024	0.345	0.645
hsa-miR-143	hsa-miR-27b	0.024	0.345	0.645
hsa-miR-135b	hsa-miR-146a	0.013	0.351	0.6448
hsa-miR-19a	hsa-miR-16	0.02	0.347	0.6446
hsa-miR-373	hsa-miR-145	0.02	0.347	0.6446
hsa-miR-152	hsa-miR-145	0.011	0.352	0.6446
hsa-miR-22	hsa-miR-107	0.045	0.333	0.6444
hsa-miR-142-5p	hsa-miR-198	0	0.358	0.6444
hsa-miR-142-3p	hsa-miR-148a	0	0.358	0.6444
hsa-miR-93	hsa-miR-146a	0	0.358	0.6444
hsa-miR-15b	hsa-miR-1	0.021	0.346	0.6438
hsa-miR-181a	hsa-miR-15a	0.044	0.333	0.6434
hsa-miR-7	hsa-miR-205	0.062	0.323	0.6434
hsa-miR-17-5p	hsa-miR-182	0.062	0.323	0.6434
hsa-miR-107	hsa-let-7b	0.049	0.33	0.643
hsa-miR-26b	hsa-miR-214	0.067	0.32	0.643
hsa-miR-17-5p	hsa-miR-29a	0.027	0.342	0.6426
hsa-miR-101	hsa-miR-155	0.018	0.347	0.6426
hsa-miR-142-5p	hsa-miR-101	0	0.357	0.6426
hsa-miR-17-5p	hsa-miR-101	0.052	0.328	0.6424
hsa-let-7d	hsa-miR-200b	0.043	0.333	0.6424
hsa-miR-137	hsa-miR-20a	0.043	0.333	0.6424
hsa-miR-192	hsa-miR-124	0.007	0.353	0.6424
hsa-miR-142-5p	hsa-miR-27b	0.032	0.339	0.6422
hsa-miR-218	hsa-miR-107	0.032	0.339	0.6422
hsa-let-7c	hsa-miR-145	0.019	0.346	0.6418
hsa-miR-20b	hsa-let-7b	0.01	0.351	0.6418
hsa-let-7e	hsa-miR-98	0.298	0.191	0.6418
hsa-miR-372	hsa-let-7a	0.064	0.321	0.6418
hsa-miR-223	hsa-miR-96	0.026	0.342	0.6416
hsa-miR-7	hsa-miR-24	0.042	0.333	0.6414
hsa-miR-16-1	hsa-miR-30b	0.042	0.333	0.6414
hsa-miR-200a	hsa-miR-30b	0.042	0.333	0.6414
hsa-miR-23b	hsa-miR-20a	0.022	0.344	0.6412
hsa-miR-10a	hsa-miR-155	0.065	0.32	0.641
hsa-miR-372	hsa-miR-15a	0.045	0.331	0.6408
hsa-miR-19b	hsa-miR-34a	0.021	0.344	0.6402
hsa-miR-198	hsa-miR-23a	0.031	0.338	0.6394
hsa-miR-26a	hsa-miR-15a	0.056	0.324	0.6392
hsa-miR-138	hsa-miR-200a	0.018	0.345	0.639
hsa-miR-27a	hsa-miR-16	0.032	0.337	0.6386
hsa-miR-20b	hsa-miR-148a	0.039	0.333	0.6384
hsa-miR-107	hsa-miR-20a	0.044	0.33	0.638
hsa-miR-138	hsa-miR-1	0.024	0.341	0.6378
hsa-miR-122	hsa-miR-107	0.047	0.328	0.6374
hsa-miR-22	hsa-miR-30b	0.038	0.333	0.6374
hsa-let-7d	hsa-miR-222	0.038	0.333	0.6374
hsa-miR-138	hsa-miR-30	0.038	0.333	0.6374
hsa-miR-96	hsa-miR-26a	0.038	0.333	0.6374
hsa-miR-200a	hsa-miR-137	0	0.354	0.6372
hsa-miR-130a	hsa-miR-222	0.052	0.325	0.637
hsa-miR-24	hsa-miR-30d	0.071	0.314	0.6362
hsa-miR-25	hsa-miR-125b	0.054	0.323	0.6354
hsa-miR-17-5p	hsa-miR-26a	0.045	0.328	0.6354
hsa-miR-98	hsa-miR-155	0.036	0.333	0.6354
hsa-miR-106b	hsa-miR-29c	0.027	0.338	0.6354
hsa-miR-126	hsa-miR-23b	0.057	0.321	0.6348
hsa-miR-26a	hsa-miR-34a	0.01	0.347	0.6346
hsa-miR-20b	hsa-miR-32	0.035	0.333	0.6344
hsa-miR-30d	hsa-miR-15a	0.026	0.338	0.6344
hsa-miR-142-5p	hsa-miR-15a	0.008	0.348	0.6344
hsa-miR-106b	hsa-miR-19a	0.083	0.306	0.6338
hsa-miR-142-5p	hsa-let-7d	0	0.352	0.6336
hsa-miR-142-5p	hsa-miR-138	0	0.352	0.6336
hsa-miR-218	hsa-miR-9	0.034	0.333	0.6334
hsa-miR-150	hsa-miR-15b	0.025	0.338	0.6334
hsa-miR-29a	hsa-miR-34a	0.039	0.33	0.633
hsa-miR-7	hsa-miR-218	0.021	0.34	0.633
hsa-miR-214	hsa-miR-30	0.021	0.34	0.633
hsa-miR-32	hsa-miR-146a	0.012	0.345	0.633
hsa-miR-32	hsa-miR-155	0.012	0.345	0.633
hsa-miR-29c	hsa-miR-16	0.026	0.337	0.6326
hsa-miR-93	hsa-miR-203	0.033	0.333	0.6324
hsa-miR-30d	hsa-miR-1	0.022	0.339	0.6322
hsa-miR-30b	hsa-miR-125b	0.065	0.315	0.632
hsa-miR-7	hsa-miR-122	0.02	0.34	0.632
hsa-miR-218	hsa-miR-181a	0.054	0.321	0.6318
hsa-miR-7	hsa-miR-141	0.014	0.343	0.6314
hsa-miR-192	hsa-miR-30b	0.014	0.343	0.6314
hsa-miR-122	hsa-miR-181a	0.051	0.322	0.6306
hsa-miR-142-3p	hsa-miR-181b	0.051	0.322	0.6306
hsa-miR-29a	hsa-miR-1	0.027	0.335	0.63
hsa-let-7d	hsa-let-7e	0.45	0.1	0.63
hsa-miR-198	hsa-miR-15b	0	0.35	0.63
hsa-miR-7	hsa-miR-20b	0.043	0.326	0.6298
hsa-miR-372	hsa-miR-125b	0.043	0.326	0.6298
hsa-miR-192	hsa-miR-198	0.041	0.327	0.6296
hsa-let-7a	hsa-miR-30b	0.041	0.327	0.6296
hsa-miR-133a	hsa-miR-146a	0.023	0.337	0.6296
hsa-miR-203	hsa-miR-23b	0.03	0.333	0.6294
hsa-miR-93	hsa-miR-222	0.053	0.32	0.629
hsa-miR-22	hsa-miR-182	0.143	0.27	0.629
hsa-miR-25	hsa-miR-141	0.051	0.321	0.6288
hsa-miR-19a	hsa-miR-15a	0.033	0.331	0.6288
hsa-miR-27a	hsa-miR-145	0.04	0.327	0.6286
hsa-miR-26b	hsa-miR-221	0.035	0.329	0.6272
hsa-miR-126	hsa-miR-23a	0.017	0.339	0.6272
hsa-miR-200a	hsa-miR-23b	0.017	0.339	0.6272
hsa-miR-98	hsa-miR-1	0.024	0.335	0.627
hsa-miR-192	hsa-miR-25	0.038	0.327	0.6266
hsa-miR-103	hsa-miR-143	0.027	0.333	0.6264
hsa-miR-142-5p	hsa-miR-195	0	0.348	0.6264
hsa-miR-372	hsa-miR-24	0.093	0.296	0.6258
hsa-miR-7	hsa-miR-155	0.046	0.322	0.6256
hsa-miR-137	hsa-miR-155	0.029	0.331	0.6248
hsa-miR-429	hsa-miR-107	0.036	0.327	0.6246
hsa-miR-130a	hsa-miR-200b	0.043	0.323	0.6244
hsa-miR-192	hsa-miR-23a	0.034	0.328	0.6244
hsa-miR-200a	hsa-miR-124	0.007	0.343	0.6244
hsa-miR-142-3p	hsa-miR-1	0.05	0.319	0.6242
hsa-miR-16-1	hsa-miR-195	0.06	0.313	0.6234
hsa-miR-148a	hsa-miR-214	0.06	0.313	0.6234
hsa-miR-130a	hsa-miR-146a	0.038	0.325	0.623
hsa-let-7e	hsa-miR-146a	0	0.346	0.6228
hsa-miR-203	hsa-miR-23a	0.014	0.338	0.6224
hsa-miR-130b	hsa-miR-143	0.014	0.338	0.6224
hsa-miR-27a	hsa-miR-181b	0.014	0.338	0.6224
hsa-miR-135a	hsa-miR-214	0.055	0.315	0.622
hsa-miR-98	hsa-let-7b	0.253	0.205	0.622
hsa-miR-142-3p	hsa-let-7a	0.053	0.316	0.6218
hsa-miR-183	hsa-miR-181a	0.053	0.316	0.6218
hsa-miR-203	hsa-miR-30d	0.053	0.316	0.6218
hsa-miR-107	hsa-miR-125b	0.04	0.323	0.6214
hsa-miR-106b	hsa-miR-182	0.076	0.303	0.6214
hsa-miR-135a	hsa-miR-182	0.029	0.329	0.6212
hsa-miR-200a	hsa-miR-30d	0.029	0.329	0.6212
hsa-miR-203	hsa-miR-373	0.029	0.329	0.6212
hsa-miR-182	hsa-miR-181a	0.029	0.329	0.6212
hsa-let-7d	hsa-miR-206	0.034	0.326	0.6208
hsa-miR-150	hsa-miR-34a	0.034	0.326	0.6208
hsa-miR-34a	hsa-miR-124	0.017	0.335	0.62
hsa-miR-22	hsa-miR-195	0.069	0.306	0.6198
hsa-miR-10a	hsa-miR-141	0.027	0.329	0.6192
hsa-let-7f	hsa-miR-98	0.405	0.119	0.6192
hsa-miR-429	hsa-miR-26b	0.019	0.333	0.6184
hsa-miR-192	hsa-miR-29b	0.026	0.329	0.6182
hsa-miR-23a	hsa-miR-15b	0.06	0.31	0.618
hsa-miR-30c	hsa-miR-125b	0.058	0.311	0.6178
hsa-miR-93	hsa-miR-145	0.011	0.337	0.6176
hsa-miR-122	hsa-miR-26a	0.092	0.292	0.6176
hsa-miR-135a	hsa-miR-148a	0.018	0.333	0.6174
hsa-miR-203	hsa-miR-19a	0.025	0.329	0.6172
hsa-miR-181b	hsa-miR-29a	0.025	0.329	0.6172
hsa-miR-96	hsa-miR-34a	0.041	0.32	0.617
hsa-miR-29b	hsa-let-7b	0.041	0.32	0.617
hsa-miR-138	hsa-miR-320	0.017	0.333	0.6164
hsa-miR-23b	hsa-miR-141	0.024	0.329	0.6162
hsa-miR-429	hsa-miR-34a	0.038	0.321	0.6158
hsa-miR-198	hsa-miR-200a	0.038	0.321	0.6158
hsa-miR-150	hsa-miR-181b	0.065	0.306	0.6158
hsa-miR-93	hsa-miR-21	0.027	0.327	0.6156
hsa-let-7f	hsa-let-7e	0.385	0.128	0.6154
hsa-miR-16-1	hsa-miR-23a	0.016	0.333	0.6154
hsa-miR-22	hsa-miR-96	0.059	0.309	0.6152
hsa-miR-107	hsa-miR-181b	0.059	0.309	0.6152
hsa-miR-200a	hsa-miR-101	0.036	0.321	0.6138
hsa-miR-98	hsa-miR-150	0.032	0.323	0.6134
hsa-miR-29a	hsa-miR-141	0.032	0.323	0.6134
hsa-miR-107	hsa-miR-1	0.017	0.331	0.6128
hsa-miR-195	hsa-miR-1	0.033	0.322	0.6126
hsa-miR-7	hsa-miR-203	0.058	0.308	0.6124
hsa-miR-192	hsa-miR-29c	0.031	0.323	0.6124
hsa-miR-25	hsa-miR-181b	0.031	0.323	0.6124
hsa-miR-19b	hsa-let-7a	0.047	0.314	0.6122
hsa-miR-138	hsa-miR-182	0.029	0.324	0.6122
hsa-miR-27b	hsa-miR-155	0.029	0.324	0.6122
hsa-miR-126	hsa-let-7b	0.045	0.315	0.612
hsa-let-7f	hsa-miR-200b	0.045	0.315	0.612
hsa-miR-106b	hsa-let-7b	0.03	0.323	0.6114
hsa-miR-106b	hsa-miR-15b	0.012	0.333	0.6114
hsa-miR-200a	hsa-miR-29b	0.012	0.333	0.6114
hsa-miR-16-1	hsa-miR-19a	0.028	0.324	0.6112
hsa-miR-429	hsa-miR-1	0.019	0.329	0.6112
hsa-miR-30c	hsa-miR-16	0.026	0.325	0.611
hsa-miR-22	hsa-miR-106b	0.105	0.281	0.6108
hsa-miR-218	hsa-miR-198	0	0.339	0.6102
hsa-miR-152	hsa-miR-223	0	0.339	0.6102
hsa-miR-19b	hsa-miR-195	0.025	0.325	0.61
hsa-miR-205	hsa-miR-9	0.037	0.318	0.6094
hsa-miR-320	hsa-miR-16	0.04	0.316	0.6088
hsa-miR-128a	hsa-miR-145	0.022	0.326	0.6088
hsa-miR-135a	hsa-let-7b	0.02	0.327	0.6086
hsa-miR-93	hsa-miR-143	0	0.338	0.6084
hsa-miR-135a	hsa-miR-26a	0.043	0.314	0.6082
hsa-miR-30b	hsa-miR-15a	0.039	0.316	0.6078
hsa-miR-148a	hsa-let-7b	0.021	0.326	0.6078
hsa-miR-214	hsa-miR-34a	0.019	0.327	0.6076
hsa-miR-142-3p	hsa-miR-101	0.017	0.328	0.6074
hsa-miR-22	hsa-miR-25	0.067	0.3	0.607
hsa-miR-192	hsa-miR-23b	0.018	0.327	0.6066
hsa-miR-23a	hsa-miR-30	0	0.337	0.6066
hsa-miR-25	hsa-miR-16	0.034	0.318	0.6064
hsa-miR-7	hsa-miR-26a	0.016	0.328	0.6064
hsa-miR-192	hsa-miR-30c	0.016	0.328	0.6064
hsa-miR-372	hsa-miR-181b	0.016	0.328	0.6064
hsa-miR-182	hsa-miR-15a	0.057	0.305	0.606
hsa-miR-126	hsa-miR-30d	0.015	0.328	0.6054
hsa-miR-132	hsa-miR-101	0.015	0.328	0.6054
hsa-miR-101	hsa-miR-221	0.049	0.309	0.6052
hsa-miR-198	hsa-miR-205	0.013	0.329	0.6052
hsa-miR-181a	hsa-miR-195	0.013	0.329	0.6052
hsa-miR-7	hsa-miR-181a	0.039	0.314	0.6042
hsa-miR-30c	hsa-miR-9	0.039	0.314	0.6042
hsa-miR-130b	hsa-miR-148a	0.1	0.28	0.604
hsa-miR-23a	hsa-let-7a	0.046	0.31	0.604
hsa-miR-372	hsa-miR-16-1	0.037	0.315	0.604
hsa-miR-106b	hsa-miR-183	0.035	0.316	0.6038
hsa-miR-198	hsa-miR-138	0.035	0.316	0.6038
hsa-miR-22	hsa-miR-138	0.033	0.317	0.6036
hsa-miR-106b	hsa-miR-320	0.033	0.317	0.6036
hsa-miR-106b	hsa-miR-30d	0.027	0.32	0.603
hsa-miR-106b	hsa-miR-29a	0.027	0.32	0.603
hsa-miR-22	hsa-let-7c	0.07	0.296	0.6028
hsa-miR-96	hsa-miR-9	0.051	0.306	0.6018
hsa-miR-122	hsa-miR-29b	0.024	0.321	0.6018
hsa-miR-10a	hsa-miR-125b	0.058	0.302	0.6016
hsa-miR-26a	hsa-let-7b	0.047	0.308	0.6014
hsa-miR-30	hsa-miR-34a	0.057	0.302	0.6006
hsa-miR-30b	hsa-miR-124	0.012	0.327	0.6006
hsa-miR-122	hsa-miR-23a	0.046	0.308	0.6004
hsa-miR-16-1	hsa-miR-27a	0	0.333	0.5994
hsa-miR-217	hsa-miR-126	0	0.333	0.5994
hsa-miR-142-3p	hsa-miR-138	0	0.333	0.5994
hsa-miR-372	hsa-miR-93	0.115	0.269	0.5992
hsa-miR-98	hsa-miR-145	0.043	0.309	0.5992
hsa-miR-195	hsa-let-7a	0.043	0.309	0.5992
hsa-miR-150	hsa-miR-203	0.048	0.306	0.5988
hsa-miR-26a	hsa-miR-29a	0.012	0.326	0.5988
hsa-miR-23a	hsa-miR-34a	0.01	0.327	0.5986
hsa-miR-223	hsa-miR-29c	0.051	0.304	0.5982
hsa-miR-32	hsa-miR-143	0.013	0.325	0.598
hsa-miR-27a	hsa-let-7a	0.011	0.326	0.5978
hsa-miR-142-3p	hsa-miR-15a	0.054	0.302	0.5976
hsa-miR-130a	hsa-miR-206	0.045	0.307	0.5976
hsa-miR-93	hsa-miR-181b	0.016	0.323	0.5974
hsa-miR-24	hsa-miR-195	0.057	0.3	0.597
hsa-miR-218	hsa-miR-1	0.012	0.325	0.597
hsa-let-7e	hsa-miR-148a	0.019	0.321	0.5968
hsa-miR-93	hsa-miR-22	0.017	0.322	0.5966
hsa-miR-96	hsa-miR-15a	0.042	0.308	0.5964
hsa-miR-16-1	hsa-miR-27b	0.015	0.323	0.5964
hsa-miR-98	hsa-miR-16	0.022	0.319	0.5962
hsa-miR-429	hsa-miR-106b	0.02	0.32	0.596
hsa-miR-10a	hsa-miR-148a	0.02	0.32	0.596
hsa-miR-137	hsa-miR-16	0.027	0.316	0.5958
hsa-miR-126	hsa-miR-26b	0.018	0.321	0.5958
hsa-miR-205	hsa-miR-124	0.006	0.327	0.5946
hsa-miR-214	hsa-miR-124	0.006	0.327	0.5946
hsa-miR-26b	hsa-miR-107	0.029	0.314	0.5942
hsa-miR-30	hsa-miR-9	0.027	0.315	0.594
hsa-miR-7	hsa-let-7a	0.072	0.29	0.594
hsa-miR-122	hsa-miR-124	0.007	0.326	0.5938
hsa-miR-214	hsa-miR-15b	0.032	0.312	0.5936
hsa-miR-200a	hsa-miR-30c	0.03	0.313	0.5934
hsa-miR-19b	hsa-miR-181a	0.03	0.313	0.5934
hsa-miR-30c	hsa-miR-141	0.033	0.311	0.5928
hsa-miR-135a	hsa-miR-320	0.033	0.311	0.5928
hsa-miR-198	hsa-miR-23b	0.033	0.311	0.5928
hsa-miR-10a	hsa-miR-221	0.04	0.307	0.5926
hsa-miR-217	hsa-miR-20a	0.038	0.308	0.5924
hsa-miR-135b	hsa-miR-21	0.02	0.318	0.5924
hsa-miR-22	hsa-miR-98	0.083	0.283	0.5924
hsa-miR-122	hsa-miR-218	0.036	0.309	0.5922
hsa-miR-93	hsa-miR-17-5p	0.036	0.309	0.5922
hsa-miR-198	hsa-miR-183	0.036	0.309	0.5922
hsa-miR-128a	hsa-miR-221	0	0.329	0.5922
hsa-miR-320	hsa-miR-30	0	0.329	0.5922
hsa-miR-183	hsa-miR-15b	0	0.329	0.5922
hsa-miR-181b	hsa-miR-23a	0	0.329	0.5922
hsa-miR-106b	hsa-miR-198	0.034	0.31	0.592
hsa-miR-17-5p	hsa-miR-320	0.034	0.31	0.592
hsa-miR-182	hsa-miR-9	0.02	0.317	0.5906
hsa-miR-181b	hsa-miR-101	0	0.328	0.5904
hsa-miR-142-5p	hsa-miR-182	0	0.328	0.5904
hsa-miR-142-5p	hsa-miR-19b	0	0.328	0.5904
hsa-miR-138	hsa-miR-150	0	0.328	0.5904
hsa-miR-200a	hsa-miR-32	0	0.328	0.5904
hsa-miR-320	hsa-let-7b	0.052	0.299	0.5902
hsa-miR-122	hsa-miR-34a	0.022	0.315	0.589
hsa-miR-128a	hsa-miR-206	0.022	0.315	0.589
hsa-miR-183	hsa-miR-9	0.022	0.315	0.589
hsa-miR-122	hsa-miR-30d	0.013	0.32	0.589
hsa-miR-122	hsa-miR-214	0.056	0.296	0.5888
hsa-miR-96	hsa-miR-125b	0.029	0.311	0.5888
hsa-miR-126	hsa-miR-198	0.063	0.292	0.5886
hsa-miR-429	hsa-miR-24	0	0.327	0.5886
hsa-miR-107	hsa-miR-34a	0	0.327	0.5886
hsa-miR-101	hsa-miR-200c	0.032	0.309	0.5882
hsa-miR-223	hsa-miR-101	0.014	0.319	0.5882
hsa-miR-373	hsa-miR-200c	0.03	0.31	0.588
hsa-miR-122	hsa-miR-30b	0.026	0.312	0.5876
hsa-miR-203	hsa-miR-29c	0.026	0.312	0.5876
hsa-miR-22	hsa-miR-128a	0.017	0.317	0.5876
hsa-miR-218	hsa-miR-203	0.017	0.317	0.5876
hsa-miR-10a	hsa-let-7c	0.062	0.292	0.5876
hsa-let-7d	hsa-miR-143	0.027	0.311	0.5868
hsa-miR-152	hsa-miR-203	0.018	0.316	0.5868
hsa-miR-142-3p	hsa-miR-320	0.018	0.316	0.5868
hsa-miR-93	hsa-miR-200b	0	0.326	0.5868
hsa-miR-93	hsa-miR-132	0.016	0.317	0.5866
hsa-miR-16-1	hsa-miR-128a	0.019	0.315	0.586
hsa-miR-101	hsa-miR-125b	0.01	0.32	0.586
hsa-miR-181a	hsa-miR-29b	0.035	0.306	0.5858
hsa-miR-217	hsa-miR-21	0.035	0.306	0.5858
hsa-miR-142-3p	hsa-miR-125b	0.069	0.287	0.5856
hsa-miR-142-3p	hsa-miR-27a	0.031	0.308	0.5854
hsa-miR-148a	hsa-let-7c	0.029	0.309	0.5852
hsa-miR-429	hsa-miR-25	0.02	0.314	0.5852
hsa-miR-152	hsa-miR-183	0.02	0.314	0.5852
hsa-miR-126	hsa-let-7d	0.02	0.314	0.5852
hsa-miR-26a	hsa-miR-30	0.011	0.319	0.5852
hsa-miR-23b	hsa-let-7a	0.074	0.284	0.5852
hsa-miR-25	hsa-miR-19a	0.039	0.303	0.5844
hsa-miR-98	hsa-miR-200c	0.021	0.313	0.5844
hsa-miR-29a	hsa-miR-16	0.021	0.313	0.5844
hsa-miR-320	hsa-miR-9	0.044	0.3	0.584
hsa-miR-148a	hsa-miR-15a	0.015	0.316	0.5838
hsa-miR-101	hsa-miR-9	0.022	0.312	0.5836
hsa-miR-135b	hsa-miR-143	0	0.324	0.5832
hsa-miR-122	hsa-miR-320	0.034	0.305	0.583
hsa-miR-148a	hsa-miR-23a	0.032	0.306	0.5828
hsa-miR-205	hsa-miR-34a	0.058	0.291	0.5818
hsa-miR-373	hsa-miR-9	0.031	0.306	0.5818
hsa-miR-148a	hsa-miR-30	0.013	0.316	0.5818
hsa-miR-320	hsa-miR-214	0.056	0.292	0.5816
hsa-miR-20b	hsa-miR-96	0.047	0.297	0.5816
[truncated: 2,853 more rows]
